1     **A High-Throughput Physiological Functional Phenotyping**  
2     **System for Time- and Cost-Effective Screening of Potential**  
3     **Biostimulants**

4  
5  
6     **Running title: Physiological-phenotyping of biostimulants under drought**

7  
8     Ahan Dalal<sup>1</sup>, Ronny Bourstein<sup>1,2</sup>, Nadav Haish<sup>1</sup>, Itamar Shenhar<sup>1</sup>, Rony Wallach<sup>2</sup>,  
9     Menachem Moshelion<sup>1\*</sup>

10  
11     <sup>1</sup>The Robert H. Smith Faculty of Agriculture, Food and Environment, Institute of  
12     Plant Sciences and Genetics in Agriculture, The Hebrew University of Jerusalem,  
13     Rehovot, Israel

14     <sup>2</sup>The Robert H. Smith Faculty of Agriculture, Food and Environment, Department of  
15     Soil and Water Sciences, The Hebrew University of Jerusalem, Rehovot, Israel

16  
17     Ahan Dalal: [ahan.dalal@mail.huji.ac.il](mailto:ahan.dalal@mail.huji.ac.il)

18     Ronny Bourstein: [ronny.bourstein@mail.huji.ac.il](mailto:ronny.bourstein@mail.huji.ac.il)

19     Nadav Haish: [nadohaish@gmail.com](mailto:nadohaish@gmail.com)

20     Itamar Shenhar: [itamar.shenhar@mail.huji.ac.il](mailto:itamar.shenhar@mail.huji.ac.il)

21     Rony Wallach: [rony.wallach@mail.huji.ac.il](mailto:rony.wallach@mail.huji.ac.il)

22  
23     \*Correspondence:

24     Menachem Moshelion

25     [menachem.moshelion@mail.huji.ac.il](mailto:menachem.moshelion@mail.huji.ac.il)

26  
27  
28  
29     Words: 8680

30     Number of main figures: 7

31     Number of tables: 1

32     Number of supplementary figures: 6

33

34

35 **ABSTRACT**

36

37 The improvement of crop productivity under abiotic stress is one of the biggest  
38 challenges faced by the agricultural scientific community. Despite extensive research,  
39 the research-to-commercial transfer rate of abiotic stress-resistant crops remains very  
40 low. This is mainly due to the complexity of genotype  $\times$  environment interactions  
41 and in particular, the ability to quantify the dynamic plant physiological response  
42 profile to a dynamic environment.

43

44 Most existing phenotyping facilities collect information using robotics and automated  
45 image acquisition and analysis. However, their ability to directly measure the  
46 physiological properties of the whole plant is limited. We demonstrate a high-  
47 throughput functional phenotyping system (HFPS) that enables comparing plants'  
48 dynamic responses to different ambient conditions in dynamic environments due to its  
49 direct and simultaneous measurement of yield-related physiological traits of plants  
50 under several treatments. The system is designed as one-to-one (1:1) plant-  
51 [sensors+controller] units, i.e., each individual plant has its own personalized sensor,  
52 controller and irrigation valves that enable (i) monitoring water-relation kinetics of  
53 each plant-environment response throughout the plant's life cycle with high  
54 spatiotemporal resolution, (ii) a truly randomized experimental design due to multiple  
55 independent treatment scenarios for every plant, and (iii) reduction of artificial  
56 ambient perturbations due to the immobility of the plants or other objects. In addition,  
57 we propose two new resilience-quantifying-related traits that can also be phenotyped  
58 using the HFPS: transpiration recovery rate and night water reabsorption.

59

60 We use the HFPS to screen the effects of two commercial biostimulants (a seaweed  
61 extract—ICL-SW, and a metabolite formula—ICL-NewFo1) on *Capsicum annuum*  
62 under different irrigation regimes. Biostimulants are considered an alternative  
63 approach to improving crop productivity. However, their complex mode of action  
64 necessitates cost-effective pre-field phenotyping. The combination of two types of  
65 treatment (biostimulants and drought) enabled us to evaluate the precision and  
66 resolution of the system in investigating the effect of biostimulants on drought  
67 tolerance. We analyze and discuss plant behavior at different stages, and assess the  
68 penalty and trade-off between productivity and survivability. In this test case, we  
69 suggest a protocol for the screening of biostimulants' physiological mechanisms of  
70 action.

71

72 **KEYWORDS**

73 Biostimulant, Critical soil water availability ( $\theta_c$ ), Drought resilience, Night water  
74 reabsorption, Physiological phenotyping, Physiological trait correlation, Productivity-  
75 survivability trade-off

76 **INTRODUCTION**

77

78 To meet the food-security demands of an increasing global population, crop yields  
79 must double by 2050 (Ray et al., 2013). Despite an increase in crop productivity in the  
80 last few decades, the increased rate is not expected to match the demand, mainly due  
81 to the negative effects of climate change (abiotic environmental stresses such as  
82 drought, temperature extremes and flooding) and degrading soil quality. In fact,  
83 commercially grown crops are expected to achieve, on average, only about 50% of  
84 their potential yield under field conditions (Hatfield and Walthall, 2015; Foyer et al.,  
85 2016). In the last three decades, vast research had been invested in improving plant  
86 responses to various stresses. Nevertheless, the bench-to-field transfer rate (ratio of  
87 patents to marketed commercial seeds) of abiotic stress-resistant crops is very low,  
88 due to the high complexity of dynamic plant–environment interactions (Graff et al.,  
89 2013, Dalal et al., 2017).

90

91 **Physiological phenotyping for crop improvement**

92 The major gap between the successful breeding and yield improvement results from  
93 the unpredictable outcome of the complex genotype × environment interactions  
94 (Miflin 2000; Moshelion and Altman 2015). To date, the major obstacle to bridging  
95 this gap has been the lack of an efficient method for identifying and quantifying yield-  
96 related traits at early stages of plant growth across vast numbers of plants/genes  
97 (Moshelion and Altman 2015, Negin and Moshelion 2017). Another potential  
98 bottleneck is the genotype–phenotype gap. The availability of new molecular tools  
99 has enhanced the efficiency of classical breeding and crop improvement (Spindel et  
100 al., 2015; Bhat et al., 2016; Collard and Mackill 2008; Gosa et al., 2018). To achieve  
101 meaningful results in drought tolerance, molecular approaches to crop improvement  
102 must be linked to suitable phenotyping protocols at all stages, such as the screening of  
103 germplasm collections, mutant libraries, mapping populations, transgenic lines and  
104 breeding materials, and the design of OMICs and quantitative trait locus experiments  
105 (Salekdeh et al., 2009). Thus, to improve crops and to meet the challenges ahead, the  
106 genotypic view and emphasis on genomics need to be balanced by a phenocentric  
107 approach with an emphasis on phenomics, to minimize the genotype–phenotype gap  
108 (Miflin 2000). The development of a high-resolution, high-throughput diagnostic  
109 screening platform for the study of whole-plant physiological performance that serves  
110 for phenotypic screening might bridge this gap (Moshelion and Altman 2015).

111

112 Indeed, the number of phenotyping facilities has increased dramatically in the last  
113 decade. Most of these facilities collect information using robotics and automated  
114 image acquisition and analysis (White et al., 2012; Kumar et al., 2015; Ghanem et al.,  
115 2015; Fischer et al., 2014; Fiorani and Schurr 2013; Gosa et al., 2018). Nevertheless,  
116 the quest for more detailed and in-depth phenotyping of the dynamic  
117 genotype × environment interactions and plant stress responses (in particular during  
118 drought) has put the capability of the existing methods into question (Ghanem et al.,  
119 2015; Li et al., 2014; Halperin et al., 2017; Rahaman et al., 2015; reviewed by Gosa et  
120 al., 2018). Herein, we demonstrate a high-throughput functional phenotyping system  
121 (HFPS) composed of gravimetric systems that enable us to compare plants' dynamic  
122 responses to different ambient conditions in dynamic environments, due to its direct  
123 and simultaneous measurement of the yield-related physiological traits of all plants  
124 under several treatments.

125

## 126 **Phenotyping for biostimulants in drought response**

127 Apart from the traditional strategies to improve crop productivity under an uncertain  
128 environment and abiotic stress, an alternative approach is evolving. This approach  
129 considers the use of organic molecules, externally applied to the plant at low  
130 concentrations, to stimulate many aspects of growth and development, pathogen  
131 defense, stress tolerance and reproductive development. These organic molecules,  
132 collectively termed biostimulants, have become more and more common in the global  
133 market in the last two and a half decades (reviewed by Yakhin et al.,  
134 2017). Biostimulants have been defined in many different ways. In the scientific  
135 literature, the term biostimulant was first defined by Kauffman et al. (2007) in a peer-  
136 reviewed paper, with modifications: “biostimulants are materials, other than  
137 fertilizers, that promote plant growth when applied in low quantities” (reviewed by du  
138 Jardin, 2015). However, the definition of biostimulants adopted by the European  
139 Biostimulants Industry Council specifies that these materials should not function by  
140 virtue of the presence of essential mineral elements, known plant hormones or  
141 disease-suppressive molecules (Brown and Saa 2015). Recently, biostimulants were  
142 defined by Yakhin et al. (2017) as “a formulated product of biological origin that  
143 improves plant productivity as a consequence of the novel, or emergent properties of  
144 the complex of constituents, and not as a sole consequence of the presence of known  
145 essential plant nutrients, plant growth regulators, or plant protective compounds.”  
146 However, due to their complex composition and diversity, biostimulants are classified  
147 differently by different research groups. Many categorize biostimulants based on the  
148 natural raw materials used, the origin of their active ingredients and modes of action,  
149 inclusion or exclusion of microorganisms, and/or mode of action of the biostimulant  
150 (Ikrima and Kolbin 2004; Basak 2008; Du Jardin 2012; Bulgari et al. 2015; Yakhin et  
151 al., 2017).

152  
153 Biostimulants are used in all stages of agriculture, namely, in seed treatments, during  
154 plant growth, and postharvest. They are applied both as foliar sprays and through the  
155 soil. Biostimulants may function in various ways, as comprehensively summarized by  
156 Yakhin et al. (2017). Their mechanism of action may comprise activation of nitrogen  
157 metabolism or phosphorus release from soils, generic stimulation of soil microbial  
158 activity, or stimulation of root growth and enhanced plant establishment. They  
159 stimulate plant growth by enhancing plant metabolism, stimulating germination,  
160 improving photosynthesis, and/or increasing the absorption of nutrients from the soil,  
161 thus increasing plant productivity. Studies have shown a clear protective role of a  
162 diverse number of biostimulants against abiotic stress, as reviewed by Van Oosten et  
163 al. (2017). Nevertheless, and despite the extensive literature suggesting that  
164 biostimulants decrease the effects of abiotic stress (and in particular drought stress),  
165 information regarding their physiological mechanisms of action is limited. The large  
166 number of potential candidate biostimulants and the need to elucidate their particular  
167 modes of action, optimal concentrations, and types of application, create a substantial  
168 bottleneck in the research and development of new biostimulant products. High-  
169 throughput phenotyping technologies have been successfully employed in some  
170 aspects of plant breeding (Araus and Cairns, 2014; Tardieu et al., 2017), but their  
171 application to assess plant biostimulant action has been limited (Petrozza et al., 2014;  
172 reviewed by Rouphael et al., 2018), despite the potential benefits of using these  
173 technologies in biostimulant product screening (Rouphael et al., 2018).

174

175 In this study, we tested the effectiveness of physiological phenotyping for  
176 understanding the physiological ‘mode of action’ of biostimulant activity on the  
177 whole plant's drought response. We tested the impact of biostimulants on several  
178 quantitative yield-related physiological traits: transpiration rate, growth rate, and  
179 water-use efficiency (WUE).

180

## 181 **MATERIALS AND METHODS**

182

183

### 184 **Plant Material**

185 The seeds of pepper (*Capsicum annuum* var. Rita) were obtained from Zeraim  
186 Gedera-Syngenta, Israel. For germination, the seeds were sown in a tray with 10-mL  
187 cones filled with commercial growing medium (Matza Gan, Shaham, Givat-Ada,  
188 Israel), composed of (w/w) 55% peat, 20% tuff and 25% puffed coconut coir fiber.  
189 The trays were well irrigated and kept in the same greenhouse (on side-tables) where  
190 the experiment was performed. When the seedlings were 4 weeks old, the growing  
191 medium was carefully washed off (to avoid root damage) the seedling roots and the  
192 seedlings were immediately transferred to 4-L pots filled with 20/30 sand (Negev  
193 Industrial Minerals Ltd., Israel). The numbers 20/30 refer to the upper and lower size  
194 of the mesh screen through which the sand was passed (20 = 20 squares across one  
195 linear inch of screen), resulting in a sand particle size of between 0.595 and 0.841  
196 mm. The volumetric water content (VWC) of the freely drained substrate, noted as  
197 pot capacity, was ~24% (for details, see Experimental Setup section).

198

### 199 **The Physiological Phenotyping Platform**

200 The experiment was conducted in June–July 2018 in a commercial-like greenhouse  
201 located at the Faculty of Agriculture, Food and Environment in Rehovot, Israel. The  
202 greenhouse temperature was controlled using fans that blow air through a moist  
203 mattress, keeping it below 38°C. The temperature and relative humidity (RH) were  
204 21–38°C and 30–80%, respectively. The plants were grown under natural light  
205 (midday maximum of 1300  $\mu\text{mol}\ \square\ \text{s}^{-1}\ \text{m}^{-2}$ ), representative values for natural  
206 conditions during the summer in the central part of Israel, including Rehovot. The  
207 temperature, RH, photosynthetically active radiation, barometric pressure and vapor  
208 pressure deficit in the greenhouse were continuously monitored by Plantarray  
209 meteorological station (Plant-Ditech Ltd., Israel).

210

211 The functional phenotyping system Plantarray 3.0 platform (Plant-Ditech) was used to  
212 monitor the plants' performance during the entire experimental period by controlling  
213 the schedule and quantity of irrigation. This platform (Figure 1A and Supplementary  
214 Figure 1), which enables performing high-throughput physiological functional  
215 phenotyping, includes 72 units of highly sensitive, temperature-compensated load  
216 cells that are used as weighing lysimeters. Each unit is connected to its personalized  
217 controller, which collects the data and controls the irrigation to each plant separately.  
218 An independent controller for each pot enables tight feedback irrigation, based on the  
219 plant's transpiration rate. Each controller unit is connected to its neighbor for serial  
220 data collection and loading to a server. A pot with a single plant is placed on each  
221 load cell (for more details, see Experimental Setup section). The data were analyzed  
222 by SPAC-analytics (Plant-Ditech), a designated online web-based software that

223 enables viewing and analyzing the real-time data collected from the Plantarray  
224 system.

225

### 226 **Nutrition and Treatments**

227 The composition of the nutrients supplied to the plants by the irrigation system  
228 (fertigation) is provided in Table 1. Two different commercial biostimulants were  
229 used: seaweed extract (ICL-SW) and a metabolite extract formula (ICL-NewFo1)  
230 (both supplied and produced by ICL Specialty Fertilizers, Holland). The biostimulants  
231 were prepared in two different containers that were placed on two additional load  
232 cells to precisely track their application. The biostimulants were provided to the plants  
233 together with the nutrients via the controlled irrigation system (Supplementary Figure  
234 1). The biostimulant concentration and dosage were as per the manufacturer's  
235 instructions: ICL-NewFo1 (3.53 mg/L) was provided daily and ICL-SW (0.133 mg/L)  
236 once a week.

237

238 The experiment lasted 36 days and included two treatments: (i) ample irrigation that  
239 aimed to provide non-stressed conditions for the plants throughout the experiment  
240 (termed well-irrigated plants), (ii) controlled drought (days 13–30) preceded by a  
241 period of ample irrigation, noted as pretreatment (days 1–12), and followed by  
242 resumption of ample irrigation (recovery period) (see Figure 2B and Experimental  
243 Setup section for details). The treatments included ICL-SW, ICL-NewFo1 or no  
244 biostimulants (control). Overall, we had six different experimental groups: three with  
245 ample irrigation (control–well irrigated, ICL-SW–well irrigated and ICL-NewFo1–  
246 well irrigated) and three groups subjected to drought (control–drought, ICL-SW–  
247 drought, and ICL-NewFo1–drought). Each of these groups consisted of 8–12  
248 repetitions (plants) that were arranged in a randomized fashion on the array to ensure  
249 uniform exposure of all groups, thereby overcoming the inherent variations in ambient  
250 conditions (Figure 1B).

251

### 252 **Experimental Setup**

253 The experimental setup was generally similar to Halperin et al. (2017) with some  
254 modifications. Briefly, before the start of the experiment, all load-cell units were  
255 calibrated for reading accuracy and drift level under constant load weights (1 kg and 5  
256 kg). Sand was used as the growing substrate because (i) it is an inert substance (sand  
257 is free of any nutrients, helping to precisely understand the effect of any chemical  
258 applied externally through irrigation), (ii) it is easily washed off the roots (helping to  
259 study the roots after the completion of the experiment), and (iii) pot capacity is  
260 reached rapidly with a repeatable pattern after each irrigation (at the end of free  
261 drainage), helping to study the plants' short-term resilience trait, noted as “night water  
262 reabsorption” (see Measurement of Quantitative Physiological Traits section for  
263 details). The sand in all of the pots was washed thoroughly several times prior to  
264 transfer of the seedlings. Each pot was placed into a Plantarray plastic drainage  
265 container on a lysimeter. The container fit the pot size to prevent evaporation. The  
266 container has orifices on its side walls at different heights to enable different water  
267 levels after drainage of excess water following irrigation. Evaporation from the sand  
268 surface was prevented by a plastic cover with a circle cut out at its center through  
269 which the plants grew.

270

271 Each pot was irrigated by multi-outlet dripper assemblies (Netafim, Israel) that were  
272 pushed into the soil to ensure that the medium in the pot was uniformly wetted at the



273 end of the free drainage period following each irrigation event. Irrigations were  
274 programmed to run during the night in four consecutive pulses. A 2-h interval was  
275 maintained between the first irrigation pulse and the last three. This irrigation regime  
276 enabled determining the plants' night water reabsorption, one of the traits indicating  
277 plant resilience (see Measurement of Quantitative Physiological Traits section). The  
278 amount of water left in the drainage containers underneath the pots at the end of the  
279 irrigation events was intended to provide water to the well-irrigated plants beyond the  
280 water volume at pot capacity. The associated monotonic weight decrease throughout  
281 the day hours was essential for the calculation of the different physiological traits by  
282 the data-analysis algorithms.

283

284 The drought treatment started on day 13 and ended when the plants' daily  
285 transpiration had reached ~80 mL per day. To prevent rapid depletion of the water in  
286 the sandy soil in the pots, we conducted gradual deficit irrigation that reduces the  
287 irrigation levels every day to 80% of the previous day's transpiration, for each plant  
288 separately and independently (using Plantarray's automated feedback irrigation  
289 system; Figure 2B).

290

### 291 **Measurement of Quantitative Physiological Traits**

292 The following water-relations kinetics and quantitative physiological traits of the  
293 plants were determined simultaneously, following Halperin et al.'s (2017) protocols  
294 and equations implemented in the SPAC-analytics software: daily transpiration,  
295 transpiration rate, normalized transpiration (E), transpiration rate vs. calculated VWC  
296 using a piecewise linear fit, and WUE. Cumulative daily transpiration was calculated  
297 as the sum of daily transpiration for all 36 days of the experiment. The VWC in the  
298 sand medium was calculated by a mass balance between the system weight at pot  
299 capacity when free drainage ceases and its concurrent weight.

300

301 The estimated plant weight at the beginning of the experiment was calculated as the  
302 difference between the total system weight and the sum of the tare weight of pot +  
303 drainage container, weight of soil at pot capacity, and weight of water in the drainage  
304 container at the end of the free drainage. The plant weight at the end of a growth  
305 period (calculated plant weight) was calculated as the sum of the initial plant weight  
306 and the multiplication of the cumulative transpiration during the period by the WUE.  
307 The latter, determined as the ratio between the daily weight gain and the daily  
308 transpiration during that day, was calculated automatically on a daily basis by the  
309 SPAC-analytics software. Note that the WUE approached a constant value during the  
310 pretreatment period.

311

312 The plant's recovery from drought was described by the rate at which the plant gained  
313 weight following resumption of irrigation (recovery stage). The physiological trait  
314 representing the plant's transpiration recovery from drought was determined as the  
315 ratio between the slope of the daily transpiration increase during the recovery phase  
316 (recovery slope) and the slope of the daily transpiration decrease during the drought  
317 period (stress degree). The slopes were calculated using a linear regression.

318

319 The night water reabsorption trait was determined as the difference in system weight  
320 between the end of the last and first irrigations of a given irrigation event (i.e. single  
321 night), representing the water absorbed by the plant during the very short period when  
322 transpiration is practically negligible. This calculation is based on the fact that the

323 drainage of surplus water in sand is rapid and pot capacity is reached prior to the  
324 subsequent irrigation (Supplementary Figure 2). We considered the plants' short-term  
325 water reabsorption capability during the recovery stage to be an additional  
326 physiological trait representing the plant's resilience to drought. Note that the water  
327 reabsorption by the plant during the night hours was normalized to its weight.

328

329 The recovery stage lasted 6 days, after which the experiment was stopped. As pepper  
330 is an indeterminate plant, it did not reach its full yield capacity. Consequently, the  
331 experiment was terminated at this stage as the treatment conducted to that point had a  
332 direct effect on the existing fruit. The shoots and fruit were harvested from ~10-week-  
333 old plants, irrespective of their size, in the early morning hours. The fresh shoot  
334 weight was calculated by the system as the difference in actual gravimetric weight  
335 between the day of shoot harvest at 0400 h (at the end of the last irrigation) and the  
336 following day at the same time. The fruit were collected from the harvested shoot and  
337 counted. The fruit and shoots (without fruit) were weighed when a constant weight  
338 had been reached during drying in a hot air oven at 60°C. The roots were collected  
339 from the pots, washed thoroughly to remove the sand particles, and dried in a hot air  
340 oven at 60°C until no further reduction in weight was measured, and finally weighed.  
341 The total dry plant weight is the sum of dry shoot weight, dry root weight and dry  
342 fruit weight.

343

#### 344 **Statistical Analysis**

345 Means were compared using analysis of variance (ANOVA) and Student's *t*-test  
346 (noted in the figure legends) in JMP Pro 14 software.

347

## 348 **RESULTS**

349

350 A randomized experimental design was performed to quantitatively compare the  
351 impacts of two biostimulants (seaweed extract ICL-SW and metabolite formula ICL-  
352 NewFo1) on the plant's key physiological traits. The effects of the two biostimulants  
353 were compared to controls (no biostimulant) under two irrigation scenarios: (i) well  
354 irrigated, and (ii) drought stress starting with a well-irrigated period, then a controlled  
355 drought phase and a successive recovery period (Figure 2B).

356

#### 357 **Biostimulants Affect Plant Water Loss**

358 Daily transpiration increased gradually for all six groups during the well-irrigated  
359 period (pretreatment; Figure 3A). Conversely, daily transpiration and VWC in the pot  
360 gradually decreased throughout the drought period that started on day 13 of the  
361 experiment (Figures 3A and B, respectively). Daily transpiration and VWC and  
362 increased sharply upon irrigation resumption on day 31 of the experiment (recovery  
363 period) (Figures 3A and B, respectively). The physiological drought point (defined as  
364 the soil VWC value that begins to limit transpiration rate [critical VWC,  $\theta_{\text{critical}}$  ( $\theta_c$ )])  
365 was determined for the plants subjected to drought (Figure 3C). A  $\theta_c = 0.15$  was  
366 obtained for the control and two biostimulant treatments, but due to the different  
367 pattern of VWC decrease in the ICL-SW-treated plants compared to the other two  
368 groups (Figure 3B), they reached  $\theta_c$  on different days. The  $\theta_c$  for the control and ICL-  
369 NewFo1-treated plants was reached on day 22.5, and on day 21 for the ICL-SW-  
370 treated plants (Figure 3B,C). The impact of drought on the daily transpiration rate  
371 pattern of the treated and untreated plants relative to that of the three well-irrigated  
372 groups is illustrated in Figure 3D for days 27–29, revealing that the ICL-SW-treated



373 plants experienced a significantly lower midday (between 1200 and 1400 h)  
374 transpiration rate under drought but reached a significantly higher transpiration rate  
375 under full irrigation (Figure 3E). Under ample irrigation, the ICL-NewFo1-treated  
376 plants had a significantly higher transpiration rate than the control plants, and a  
377 similar reduction in transpiration rate under drought (Figure 3E).

378

### 379 **Biostimulants Enhance Biomass and WUE**

380 Transpiration was normalized to biomass by using the calculated plant weight for the  
381 entire experimental period (36 days) for all six groups (Figure 4A). The rate of plant  
382 weight gain during the well-irrigated period (pretreatment) was similar for all six  
383 groups, and decreased during the drought period for the three drought-stressed groups.  
384 The rate of weight gain for the latter groups began to increase again during the  
385 recovery period (Figure 4A). Nevertheless, the higher rate of weight gain for the ICL-  
386 SW-treated plants during this latter period resulted in significantly higher dry shoot  
387 biomass than for controls at the end of the experiment, probably due to the cumulative  
388 effect of this trend (Figure 4B). The correlation between shoot dry biomass and  
389 cumulative daily transpiration, which is, in fact, the dry-weight-related WUE, was  
390 relatively high ( $R^2 > 0.8$ ) for both the well-irrigated and water-deprived plants (Figure  
391 4C). Plant transpiration normalized to plant weight, E (Figure 4D), was low for  
392 biostimulant-treated plants under both well-irrigated and drought conditions compared  
393 to its value for untreated controls. Here again, the ICL-SW-treated plants showed  
394 significantly lowest midday E under drought (in accordance with the transpiration  
395 rate, Figure 3E). The higher measured transpiration rates (Figure 3E) and higher dry  
396 shoot biomass (Figure 4B) for the biostimulant-treated plants compared to the  
397 controls under ample irrigation indicate an improvement in fresh weight-related  
398 WUE. However, this improvement (increase of ~18% for ICL-SW-treated and ~14%  
399 for ICL-NewFo1-treated plants) was not significant ( $P$ -value for ICL-SW was 0.067  
400 and for ICL-NewFo1, 0.16; Figure 4E).

401

### 402 **Biostimulant Effect on Plant Resilience**

403 The two considered traits for an estimation of the plants' recovery from drought stress,  
404 i.e., resilience, were: (i) whole-plant transpiration recovery: the rate at which the daily  
405 transpiration increases following irrigation resumption was compared to the rate at  
406 which the daily transpiration decreases during the drought period. For the sake of  
407 simplicity, both rates were determined as the linear regression of the respective data  
408 points (Figure 5A), showing that ICL-SW reduced plant resilience compared to  
409 control plants (Figure 5B); (ii) the night water reabsorption (namely, regaining the  
410 water that was lost during the day; see Supplementary Figure 2) for the pretreatment  
411 and recovery periods, depicted in Figures 5C,D and 5E,F, respectively. The night  
412 water reabsorption during the pretreatment period was significantly higher for the  
413 biostimulant-treated plants compared to the control, with the highest values for the  
414 ICL-NewFo1-treated plants (Figure 5C). The drought stress reduced night water  
415 reabsorption capability during recovery for all three groups. Nevertheless, compared  
416 to the control, the biostimulants improved the reabsorption capability during recovery,  
417 with significantly highest capability for ICL-NewFo1-treated plants (Figure 5E). A  
418 similar trend was observed when the night water reabsorption was normalized to the  
419 plant weight, with significantly highest reabsorption capability in ICL-NewFo1-  
420 treated plants compared to the control (Figures 5D,F).

421

### 422 **Biostimulant Effect on Fruit Number**

423 As pepper plants are indeterminate, we decided to terminate the experiment shortly  
424 after recovery, despite the fact that full fruit weight potential had not been reached.  
425 Nevertheless, at this stage, fruit set in all groups was assumed to reflect the treatment,  
426 as seen in the distribution of the three different fruit sizes (small, medium and  
427 commercial) (Supplementary Figure 3). For the well-irrigated plants, 33% of the  
428 control fruit reached a commercial size, compared to only 19% of ICL-SW-treated  
429 and 14% of ICL-NewFo1-treated plants' fruit. The total number of fruit was counted  
430 for all six groups and correlated to cumulative daily transpiration (Figure 6). ICL-SW  
431 significantly enhanced the total fruit number under ample irrigation (Student's *t*-test);  
432 however, the ICL-SW-treated plants were significantly affected by the drought  
433 relative to their well-irrigated condition (Figure 6A). As similar results were observed  
434 for the transpiration rate of these treated plants (Figure 3E), we calculated the  
435 correlation between total fruit number and cumulative daily transpiration. The  
436 correlation for well-irrigated plants was slightly better ( $R^2 = 0.5$ ) than that for plants  
437 subjected to drought (Figure 6B).

438

## 439 **DISCUSSION**

440

### 441 **Advantages of the HFPS in Pre-Field Screening for Promising Candidates and** 442 **Effective Treatments**

443 Most high-throughput phenotyping facilities are based on remote sensing or imagers  
444 (Araus et al., 2018), and are expected to show improved temporal phenotypic  
445 resolution. However, their effective spatial resolution is still relatively limited to  
446 morphological and indirect physiological traits. In addition, measurements are not  
447 taken simultaneously; given the fact that the plant response to a dynamic environment  
448 is dynamic, simultaneous measurements are needed for comparative analyses. Thus,  
449 the selection of candidates and treatments for testing remains a challenge. High-  
450 throughput phenotyping platforms in greenhouses have the advantage of  
451 characterizing individual pot-grown plants without the constraints imposed by  
452 overlapping canopies from neighboring plants or variable climatic conditions that can  
453 hamper data-acquisition accuracy (Fernandez et al., 2017). Although an effective  
454 approach would be to screen biostimulants for their mode of action from “field to  
455 greenhouse”, the “greenhouse-to-field” approach is not only time- and cost-effective  
456 but also narrows the number of products to be tested later under field conditions  
457 (Rouphael et al., 2018). On the other hand, the accuracy of controlled growth  
458 environments in targeting genetically complex traits is questionable, as phenotypes  
459 from spaced pots and controlled conditions are poorly correlated with phenotypes in  
460 field environments, where plants compete with their neighbors (Nelissen et al., 2014;  
461 Poorter et al., 2016; Fernandez et al., 2017; Fischer et al., 2018; Rebetzke et al.,  
462 2018). We suggest that to better correlate a plant's response to its environment, it is  
463 important to phenotype under conditions that are as similar as possible to those in the  
464 field. Thus, an efficient pre-field phenotype-screening experiment should offer the  
465 possibility to predict yield penalties in response to environmental adversity in the  
466 early stages of plant growth. Choice of the appropriate phenotyping method is one of  
467 the key components in pre-field screens (phenotyping) for complex traits under  
468 abiotic stress conditions (reviewed by Negin, 2017). This improves the chances of the  
469 selected candidates performing well under field conditions. The following principles,  
470 tested in this study, may contribute to this goal.

471

472 (i) Conducting experiments under semi-controlled conditions that are typical of  
473 farmers' growing facilities (see Figure 2A). The spaces between the pots were kept to  
474 a minimum to mimic commercial growth conditions.

475

476 (ii) Using a truly randomized experimental design to mimic the biological variability,  
477 as well as the spatial and temporal variability in ambient conditions in the growth  
478 facility. Here, we used a randomized experimental design with one-to-one (1:1) plant–  
479 [sensors+controller] units which enabled running an independent feedback irrigation  
480 scenario for every plant (Figure 1, Supplementary Figure 1). Each controller was  
481 associated with a dual-valve system that allowed creating a specific combination of  
482 irrigation scenarios independently for each plant. Moreover, it overcame many of the  
483 experimental artifacts that could result from the “pot effect” (Gosa et al., 2018) by  
484 using controlled-deficit irrigation that reduced the irrigation levels every day to 80%  
485 of the previous day's transpiration (for each plant separately and based on its  
486 individual performance), preventing rapid reduction in pot soil water content. This  
487 created a relatively homogeneous drought scenario for all plants (Figure 2).

488

489 (iii) Conducting comparative and continuous measurements for all plants' water-  
490 relations kinetics (direct physiological traits) in response to the three-phase scenario  
491 (control–drought–recovery). This experimental approach offered several advantages  
492 in interpreting the plant's interactions with the environment as it compared each  
493 plant's profile to its own profile in the different phases (Figure 3A) as well as to all  
494 other plants' profiles in the experiment, simultaneously. Moreover, clarity of the stress  
495 conditions, providing the ability to repeat the exact stress scenario in other  
496 experiments, is also important when studying a desired stress-related trait. The trait in  
497 question might respond differently in plants showing different types of drought  
498 tolerance under different drought conditions (Negin and Moshelion, 2017). Therefore,  
499 for better resolution of the drought response in pot experiments, the severity and  
500 strategy of the drought stress must be well defined. To achieve a quantitative and  
501 cooperative response of the plants to a combination of biostimulants and drought  
502 treatment, we divided the experiment into three phases: before drought (pretreatment),  
503 during drought which was defined by the physiological drought point ( $\theta_c$ ), and  
504 recovery immediately after drought (resilience).

505

506 (iv) High temporal and spatial resolution of the plant–environment interactions. The  
507 ultimate trait, yield, is a cumulative trait, measured at the end of the experiment and  
508 reflecting the sum of all genetic and ambient parameters affecting the plant  
509 throughout the season. This calls for high temporal resolution and continuous  
510 measurement of the dynamic plant–environment response. The high-capacity data  
511 acquisition (480 measurements per day) of the HFPS enabled tight measurements of  
512 the plant's response to the ambient conditions, and also comparing plant performances  
513 at different time points during the day (i.e., different ambient conditions), where the  
514 differences between the treatments became significant (Figures 3 D,E).

515

516 In this study, we show that the HFPS might be an efficient diagnostic tool for a better  
517 understanding of pre-field plant x environment interactions by studying water-related  
518 physiological mechanisms under different phases of control–drought–recovery  
519 scenarios. In this pursuit, we used biostimulants as a test case due to their reported  
520 impact on the plant stress response (Van Oosten et al., 2017). Nevertheless,  
521 information on the influence of biostimulants on physiological mechanisms of action

522 is relatively scarce. Moreover, the use of biostimulants, as with other biotic and  
523 abiotic screening studies, is highly complex, and thus identification and  
524 characterization of their activity is time-consuming and expensive, as it requires large-  
525 scale field experiments. The combination of the two types of treatment (biostimulants  
526 and drought) enabled us to evaluate the benefits of the HFPS in investigating the  
527 mechanistic effect of biostimulants in drought tolerance.

528

### 529 **Quantitative Comparison to Understand the Interactions between Key** 530 **Physiological Traits and Their Trade-Offs**

531

532 Both biostimulants increased plant transpiration rate under ample irrigation compared  
533 to control plants (Figure 3). However, while the impact of ICL-SW translated to  
534 productive mechanisms (faster growth rate and later, higher fruit number), the impact  
535 of ICL-NewFo1 translated to survivability mechanisms (lower transpiration rate under  
536 drought and faster recovery—i.e., better resilience). Interestingly, the sensitivity of  
537 the plants to drought in terms of the critical VWC drought point ( $\theta_c$ ), at which a  
538 further reduction in water content reduces transpiration, remained the same, possibly  
539 due to similar root sizes (Supplementary Figure 4). This is because under water-  
540 deficit conditions, when water becomes less available to the roots, plants with smaller  
541 roots will be limited more quickly (early  $\theta_c$ ) than plants with larger roots (reviewed  
542 by Gosa et al., 2018). Thus  $\theta_c$  might be useful in predicting root phenotype.  
543 Nevertheless, as soon as the plants were exposed to drought, the two biostimulants  
544 induced different response patterns (beyond  $\theta_c$ ): ICL-NewFo1 treatment resulted in a  
545 gradual reduction in transpiration rate, reaching a minimum at a relatively lower  
546 VWC than the control and ICL-SW-treated plants (Figure 3C). Again, this type of  
547 behavior could explain the better survivability of the ICL-NewFo1-treated plants  
548 during the drought period.

549

550 In addition, the functional phenotyping approach revealed good correlations among  
551 key agronomical traits within the short study period. For example, our results revealed  
552 a high correlation between plant total dry weight and plant weight calculated by the  
553 system (Supplementary Figure 5). The fact that the system can calculate the plant  
554 biomass throughout the experiment is highly beneficial as it enables a direct  
555 measurement of the whole-plant biomass gain, in real time and in a non-destructive  
556 manner. In addition, key agronomic traits (such as grain yield) are linearly correlated  
557 to water consumption (WUE, reviewed by Gosa et al., 2018). Indeed, throughout the  
558 entire experiment, water taken up by the system (representing plant agronomic WUE,  
559 slope in Figure 4C) was almost identical to the fresh-weight WUE (taken on the first  
560 few days of the experiment; Figure 4E). Namely, ~0.003 g of plant dry weight per 1  
561 mL of transpired water vs. ~0.035 g of plant fresh weight per 1 mL of transpired  
562 water, respectively, showing a ratio of ~1:10, which is similar to the ratio between the  
563 fresh and dry shoot weight (Supplementary Figure 6). This trait is highly beneficial as  
564 it enables use of the fresh-weight WUE (determined on the first few days of the  
565 experiment), which is calculated for the entire growth period rather than the dry-  
566 weight WUE. Interestingly, these results also indicate that WUE is nearly constant  
567 throughout the growth period.

568

### 569 **Phenotyping Resilience**

570 Resilience is one of the key stress-response traits. Nevertheless, the term “resilience”  
571 is being used more and more freely, and with popularity comes confusion; thus, it

572 must assume its broadest definition. Resilience is commonly used to represent  
573 resistance, or recovery, or both (Hodgson et al., 2015). Plant stress resilience indicates  
574 plant survival and productivity after stress. In this study, we introduced two functional  
575 traits to quantify resilience: (i) transpiration recovery rate after stress (return of  
576 irrigation) and (ii) the plant's ability to reabsorb water at night during recovery from  
577 drought. We found that while the biostimulants did not affect the transpiration  
578 recovery rate, they did increase the nighttime water reabsorption ability of both the  
579 well-irrigated and recovering plants, compared to the non-treated controls (Figures  
580 5C,E). This phenomenon can be explained by the positive impact on the fresh  
581 biomass (Figure 4A), as normalizing the water reabsorption volume to the plant  
582 biomass still resulted in higher values of both biostimulant-treated plants compared to  
583 the non-treated control (Figures 5E,F). The difference between the water reabsorption  
584 of well-irrigated and recovering plants within the same group (i.e., control, ICL-SW  
585 or ICL-NewFo1) indicated drought-inflicted tissue damage, thus the night water  
586 reabsorption trait can be used as a tool to estimate tissue damage due to stress.

587

## 588 **CONCLUSION**

589

590 A comparison of the effects of two biostimulants on drought tolerance using a HFPS  
591 revealed known and new relationships between physiological traits. The two studied  
592 biostimulants (ICL-SW and ICL-NewFo1) improved the overall transpiration and  
593 biomass gain compared to control plants. However, only ICL-SW improved fruit  
594 number (Figure 6A) under ample irrigation, which was significantly reduced when the  
595 plants were exposed to drought. This might be explained by the shift in resource  
596 allocation from the reproductive to non-reproductive or vegetative biomass, for  
597 survival. A schematic depiction of the behavior of plants treated with biostimulants is  
598 given in Figure 7. The behavior can be explained in terms of risk-taking and non-risk-  
599 taking behavior. Under optimal conditions, ICL-SW-treated plants (risk-taking)  
600 sustained a longer period of higher transpiration rate and thus a longer period of  
601 substantial CO<sub>2</sub> assimilation, resulting in increased productivity (Figure 7A)  
602 compared to the ICL-NewFo1-treated plants. This behavior is advantageous only  
603 under well-irrigated conditions or during mild stress, but there is a risk of losing water  
604 faster during severe stress (Lin et al. 2007; Peng et al. 2007;  
605 McDowell et al. 2008; Sade et al. 2009; Moshelion et al., 2015). On the other hand,  
606 ICL-NewFo1-treated plants (non-risk-taking) maintain a moderate transpiration rate  
607 under optimal conditions, thus not contributing much to their productivity, but  
608 resulting in more gradual water loss under drought conditions, thereby reaching the  
609 minimal VWC (desiccation) later than the ICL-SW-treated plants, resulting in  
610 increased survivability. Thus there is a trade-off between productivity and  
611 survivability for the ICL-SW- and ICL-NewFo1-treated plants, respectively, as  
612 depicted in Figure 7B (Moshelion et al., 2015).

613

614 We suggest that these two different stimulation approaches should be implemented in  
615 different agricultural practices. Thus, the beneficial stimuli of ICL-SW may be  
616 implemented in controlled-irrigated crops, while the resilience impact of ICL-  
617 NewFo1 can be implemented for non-irrigated crops that are naturally subjected to the  
618 uncertainty of the environment. This survivability trait may also be very beneficial for  
619 annual crops (e.g., vines, turfs and silviculture) which need to overcome longer stress  
620 periods between seasons.

621



622 **AUTHOR CONTRIBUTIONS**

623

624 RW and MM conceived the original research plan. AD, NH and IS performed the  
625 experiments. RB adapted the algorithms suggested by Halperin et al. (2017) to the  
626 calculations performed in this manuscript. AD, RB and MM analyzed the data. AD  
627 and MM wrote the manuscript. All authors were involved in reviewing and editing the  
628 manuscript.

629

630 **FUNDING**

631

632 This work was supported by a grant from Israel Chemicals Ltd. (grant no. 0336396).

633

634 **ACKNOWLEDGMENTS**

635

636 AD and MM gratefully acknowledge the United States–Israel Binational Science  
637 Foundation (BSF) for the postdoctoral scholarship awarded to AD.

638

639 **Conflict of Interest Statement:** The authors declare that the research was conducted  
640 independently and in the absence of any commercial relationships that could be  
641 construed as a potential conflict of interest.

642

643 **REFERENCES**

644

645 Araus, J.L. and Cairns, J.E., 2014. Field high-throughput phenotyping: the new crop  
646 breeding frontier. *Trends in plant science*, 19(1), pp.52-61.

647 Araus, J.L., Kefauver, S.C., Zaman-Allah, M., Olsen, M.S. and Cairns, J.E., 2018.  
648 Translating high-throughput phenotyping into genetic gain. *Trends in plant science*.

649 Basak, A. (2008). “Biostimulators – definitions, classification and legislation,”  
650 in *Monographs Series: Biostimulators in Modern Agriculture. General Aspects*, ed H.  
651 Gawrońska (Warsaw: Wieś Jutra), 7–17.

652 Bhat, J.A., Ali, S., Salgotra, R.K., Mir, Z.A., Dutta, S., Jadon, V., Tyagi, A., Mushtaq,  
653 M., Jain, N., Singh, P.K. and Singh, G.P., 2016. Genomic selection in the era of next  
654 generation sequencing for complex traits in plant breeding. *Frontiers in genetics*, 7,  
655 p.221.

656 Brown, P. and Saa, S., 2015. Biostimulants in agriculture. *Frontiers in plant  
657 science*, 6, p.671.

658 Bulgari, R., Cocetta, G., Trivellini, A., Vernieri, P., and Ferrante, A. (2015).  
659 Biostimulants and crop responses: a review. *Biol. Agric. Hortic.* 31, 1–17. doi:  
660 10.1080/01448765.2014.964649

661 Collard, B.C. and Mackill, D.J., 2008. Marker-assisted selection: an approach for  
662 precision plant breeding in the twenty-first century. *Philosophical Transactions of the  
663 Royal Society of London B: Biological Sciences*, 363(1491), pp.557-572.

664 Dalal, A., Attia, Z. and Moshelion, M., 2017. To Produce or to Survive: How Plastic  
665 Is Your Crop Stress Physiology?. *Frontiers in plant science*, 8, p.2067.

666 Du Jardin, P. (2012). *The Science of Plant Biostimulants - A Bibliographic Analysis*,  
667 *Ad hoc Study Report. Brussels: European Commission*. Available online  
668 at: <http://hdl.handle.net/2268/169257> (Accessed April 25, 2013).

669 du Jardin, P., 2015. Plant biostimulants: definition, concept, main categories and  
670 regulation. *Scientia Horticulturae*, 196, pp.3-14.



- 671 Fernandez, M.G.S., Bao, Y., Tang, L. and Schnable, P.S., 2017. A high-throughput,  
672 field-based phenotyping technology for tall biomass crops. *Plant physiology*, pp.pp-  
673 00707.
- 674 Fiorani, F. and Schurr, U., 2013. Future scenarios for plant phenotyping. *Annual*  
675 *review of plant biology*, 64, pp.267-291.
- 676 Fischer, R.A., Byerlee, D. and Edmeades, G., 2014. Crop yields and global food  
677 security. *ACIAR: Canberra, ACT*, pp.8-11.
- 678 Fischer, R.A. and Rebetzke, G.J., 2018. Indirect selection for potential yield in early-  
679 generation, spaced plantings of wheat and other small-grain cereals: a review. *Crop*  
680 *and Pasture Science*, 69(5), pp.439-459.
- 681 Ghanem, M.E., Marrou, H. and Sinclair, T.R., 2015. Physiological phenotyping of  
682 plants for crop improvement. *Trends in Plant Science*, 20(3), pp.139-144.
- 683 Gosa, S.C., Lupo, Y. and Moshelion, M., 2018. Quantitative and comparative analysis  
684 of whole-plant performance for functional physiological traits phenotyping: New  
685 tools to support pre-breeding and plant stress physiology studies. *Plant Science*.
- 686 Halperin, O., Gebremedhin, A., Wallach, R. and Moshelion, M., 2017.  
687 High-throughput physiological phenotyping and screening system for the  
688 characterization of plant–environment interactions. *The Plant Journal*, 89(4), pp.839-  
689 850.
- 690 Hodgson, D., McDonald, J.L. and Hosken, D.J., 2015. What do you  
691 mean, ‘resilient’?. *Trends in ecology & evolution*, 30(9), pp.503-506.
- 692 Ikrina, M. A., and Kolbin, A. M. (2004). *Regulators of Plant Growth and*  
693 *Development, Vol. 1, Stimulants*. Moscow: Chimia.
- 694 Kumar, J., Pratap, A. and Kumar, S. eds., 2015. *Phenomics in crop plants: trends,*  
695 *options and limitations* (No. 8, p. 296). Springer India.
- 696 Li, L., Zhang, Q. and Huang, D., 2014. A review of imaging techniques for plant  
697 phenotyping. *Sensors*, 14(11), pp.20078-20111.
- 698 Lin, W., Peng, Y., Li, G., Arora, R., Tang, Z., Su, W. and Cai, W., 2007. Isolation and  
699 functional characterization of PgTIP1, a hormone-autotrophic cells-specific tonoplast  
700 aquaporin in ginseng. *Journal of experimental botany*, 58(5), pp.947-956.
- 701 McDowell, N., Pockman, W.T., Allen, C.D., Breshears, D.D., Cobb, N., Kolb, T.,  
702 Plaut, J., Sperry, J., West, A., Williams, D.G. and Yezpez, E.A., 2008. Mechanisms of  
703 plant survival and mortality during drought: why do some plants survive while others  
704 succumb to drought?. *New phytologist*, 178(4), pp.719-739.
- 705 Mifflin, B., 2000. Crop improvement in the 21st century. *Journal of experimental*  
706 *botany*, 51(342), pp.1-8.
- 707 Moshelion, M. and Altman, A., 2015. Current challenges and future perspectives of  
708 plant and agricultural biotechnology. *Trends in biotechnology*, 33(6), pp.337-342.
- 709 Moshelion, M., Halperin, O., Wallach, R., Oren, R.A.M. and Way, D.A., 2015. Role  
710 of aquaporins in determining transpiration and photosynthesis in water-stressed  
711 plants: crop water-use efficiency, growth and yield. *Plant, Cell &*  
712 *Environment*, 38(9), pp.1785-1793.
- 713 Negin, B. and Moshelion, M., 2017. The advantages of functional phenotyping in pre-  
714 field screening for drought-tolerant crops. *Functional Plant Biology*, 44(1), pp.107-  
715 118.
- 716 Nelissen, H., Moloney, M. and Inzé, D., 2014. Translational research: from pot to  
717 plot. *Plant biotechnology journal*, 12(3), pp.277-285.
- 718 Peng, Y., Lin, W., Cai, W. and Arora, R., 2007. Overexpression of a *Panax ginseng*  
719 tonoplast aquaporin alters salt tolerance, drought tolerance and cold acclimation  
720 ability in transgenic *Arabidopsis* plants. *Planta*, 226(3), pp.729-740.

- 721 Petrozza, A., Santaniello, A., Summerer, S., Di Tommaso, G., Di Tommaso, D.,  
722 Paparelli, E., Piaggese, A., Perata, P. and Cellini, F., 2014. Physiological responses to  
723 Megafol® treatments in tomato plants under drought stress: a phenomic and  
724 molecular approach. *Scientia Horticulturae*, 174, pp.185-192.
- 725 Poorter, H., Fiorani, F., Pieruschka, R., Wojciechowski, T., Putten, W.H., Kleyer, M.,  
726 Schurr, U. and Postma, J., 2016. Pampered inside, pestered outside? Differences and  
727 similarities between plants growing in controlled conditions and in the field. *New*  
728 *Phytologist*, 212(4), pp.838-855.
- 729 Rahaman, M., Chen, D., Gillani, Z., Klukas, C. and Chen, M., 2015. Advanced  
730 phenotyping and phenotype data analysis for the study of plant growth and  
731 development. *Frontiers in plant science*, 6, p.619.
- 732 Rebetzke, G.J., Jimenez-Berni, J., Fischer, R.A., Deery, D.M. and Smith, D.J., 2018.  
733 High-throughput phenotyping to enhance the use of crop genetic resources. *Plant*  
734 *Science*.
- 735 Rouphael, Y., Spíchal, L., Panzarová, K., Casa, R. and Colla, G., 2018. High-  
736 Throughput Plant Phenotyping for Developing Novel Biostimulants: From Lab to  
737 Field or From Field to Lab?. *Frontiers in plant science*, 9.
- 738 Sade, N., Vinocur, B.J., Diber, A., Shatil, A., Ronen, G., Nissan, H., Wallach, R.,  
739 Karchi, H. and Moshelion, M., 2009. Improving plant stress tolerance and yield  
740 production: is the tonoplast aquaporin SITIP2; 2 a key to isohydric to anisohydric  
741 conversion?. *New Phytologist*, 181(3), pp.651-661.
- 742 Salekdeh, G.H., Reynolds, M., Bennett, J. and Boyer, J., 2009. Conceptual framework  
743 for drought phenotyping during molecular breeding. *Trends in plant science*, 14(9),  
744 pp.488-496.
- 745 Spindel, J., Begum, H., Akdemir, D., Virk, P., Collard, B., Redona, E., Atlin, G.,  
746 Jannink, J.L. and McCouch, S.R., 2015. Genomic selection and association mapping  
747 in rice (*Oryza sativa*): effect of trait genetic architecture, training population  
748 composition, marker number and statistical model on accuracy of rice genomic  
749 selection in elite, tropical rice breeding lines. *PLoS genetics*, 11(2), p.e1004982.
- 750 Tardieu, F., Cabrera-Bosquet, L., Pridmore, T. and Bennett, M., 2017. Plant  
751 phenomics, from sensors to knowledge. *Current Biology*, 27(15), pp.R770-R783.
- 752 Van Oosten, M.J., Pepe, O., De Pascale, S., Silletti, S. and Maggio, A., 2017. The role  
753 of biostimulants and bioeffectors as alleviators of abiotic stress in crop  
754 plants. *Chemical and Biological Technologies in Agriculture*, 4(1), p.5.
- 755 White, J.W., Andrade-Sanchez, P., Gore, M.A., Bronson, K.F., Coffelt, T.A., Conley,  
756 M.M., Feldmann, K.A., French, A.N., Heun, J.T., Hunsaker, D.J. and Jenks, M.A.,  
757 2012. Field-based phenomics for plant genetics research. *Field Crops Research*, 133,  
758 pp.101-112.
- 759 Yakhin, O.I., Lubyantsev, A.A., Yakhin, I.A. and Brown, P.H., 2017. Biostimulants in  
760 plant science: a global perspective. *Frontiers in plant science*, 7, p.2049.
- 761 Yoo, C.Y., Pence, H.E., Hasegawa, P.M. and Mickelbart, M.V., 2009. Regulation of  
762 transpiration to improve crop water use. *Critical Reviews in Plant Science*, 28(6),  
763 pp.410-431.

764

## 765 **FIGURE LEGENDS**

766

767 **FIGURE 1.** Experimental setup. **(A)** View of the randomized experimental setup  
768 array consisting of 72 measuring units loaded with *Capsicum annuum*. **(B)** Block  
769 diagram of the system. Solid circles – well-irrigated plants; empty circles – plants  
770 subjected to the drought-recovery scenario. Green – ICL-SW-treated plants, orange –

771 ICL-NewFo1-treated plants, blue – control (no biostimulants) plants. Note that all pot  
772 surfaces were covered to reduce evaporation, and irrigation was injected into the soil  
773 via multi-outlet drippers to ensure even distribution of fertigation and biostimulants  
774 (see Supplementary Figure 1).

775

776 **FIGURE 2.** Atmospheric conditions and experimental progress represented as system  
777 relative weight throughout the experiment. **(A)** Daily vapor pressure deficit (VPD)  
778 and photosynthetically active radiation (PAR) during 36 consecutive days of  
779 experiment. **(B)** Raw data showing variation in the weight of the plants (relative to  
780 their respective initial weight) over the course of the experiment. Each line represents  
781 one plant/pot. During the day, the plant transpires and therefore the system loses  
782 weight, seen as a slope in the line curves. The pots were irrigated four times per night  
783 (each time to pot capacity), seen as peaks in the line curves. The irrigation was  
784 followed by drainage to reach water saturation (nighttime baseline). Note that there is  
785 no weight loss during the night. The increase in the nighttime baseline (dashed line)  
786 every day results from an increase in plant biomass. During pretreatment, all of the  
787 plants were well irrigated; from day 13, half of the plants were exposed to differential  
788 drought to reach a similar degree of stress, while the other half continued to be well-  
789 irrigated till the end of the experiment. On day 31, the water-deprived plants were  
790 recovered and continued to be well-irrigated till the end of the experiment. The three  
791 colored lines represent a single plant from each of the three groups: blue line –  
792 untreated (with biostimulants) control plants; green line – ICL-SW-treated plants;  
793 orange line – ICL-NewFo1-treated plants. Note the different drought-response  
794 behaviors of the different plants. The inset figure presents system relative weight  
795 change of one plant/pot for two consecutive days.

796

797

798 **FIGURE 3.** Effect of biostimulants on plant transpiration. **(A)** Mean  $\pm$  SE continuous  
799 daily whole-plant transpiration during the entire experimental period (36 days). **(B)**  
800 Mean  $\pm$  SE calculated volumetric water content (VWC) of the water-deprived plants  
801 throughout the experiment. **(C)** Piecewise linear fit between transpiration rate and  
802 calculated VWC for the plants subjected to drought treatment. **(D)** Mean  $\pm$  SE diurnal  
803 transpiration rate from 0600 to 1900 h during the late drought phase (day 27–29). **(E)**  
804 Mean  $\pm$  SE transpiration rate for days 27–29 from 1200 to 1400 h. Blue bars – no  
805 biostimulant control plants; green bars – ICL-SW-treated plants; orange bars – ICL-  
806 NewFo1-treated plants. Solid bars – well-irrigated conditions; stippled bars – drought  
807 conditions. Groups were compared using ANOVA by Tukey HSD test. Different  
808 letters above columns represent significant differences ( $P < 0.05$ ). Each mean  $\pm$  SE is  
809 from at least 8 plants per group.

810

811 **FIGURE 4.** **(A)** Mean  $\pm$  SE calculated whole-plant weight during the entire  
812 experimental period. **(B)** Mean  $\pm$  SE shoot dry weight, harvested at the end of the  
813 experiment. **(C)** Correlation between shoot dry weight and cumulative daily  
814 transpiration. **(D)** Midday mean  $\pm$  SE E (transpiration rate normalized to plant  
815 biomass) for days 27–29 from 1200 to 1400 h. **(E)** Mean  $\pm$  SE water-use efficiency  
816 (WUE). Blue bars – untreated (with biostimulants) control plants; green bars – ICL-  
817 SW-treated plants; orange bars – ICL-NewFo1-treated plants. Solid bars – well-  
818 irrigated conditions; stippled bars – drought conditions. Groups were compared using  
819 ANOVA by Tukey HSD test and Student's  $t$ -test. Different letters above columns

820 represent significant differences ( $P < 0.05$ ). Each mean  $\pm$  SE is from at least 8 plants  
821 per group.

822

823 **FIGURE 5.** Effect of biostimulants on plant resilience during recovery. **(A)**  
824 Mean  $\pm$  SE continuous total whole-plant daily transpiration of drought-treated plants  
825 during the entire experimental period of 36 days. Graph shows days from when stress  
826 degree and recovery slope were calculated for analysis. **(B)** Mean  $\pm$  SE resilience  
827 measured as the ratio of the recovery slope (day 31–32) to stress degree (day 18–30).  
828 **(C)** Mean  $\pm$  SE water reabsorption during pretreatment (day 11–14), and **(D)** its  
829 mean  $\pm$  SE normalized to calculated plant weight. **(E)** Mean  $\pm$  SE water reabsorption  
830 during recovery phase (day 33–36), and **(F)** its mean  $\pm$  SE normalized to calculated  
831 plant weight. Blue bars – untreated (with biostimulants) control plants; green bars –  
832 ICL-SW-treated plants; orange bars – ICL-NewFo1-treated plants. Solid bars – well-  
833 irrigated conditions; stippled bars – drought conditions. Groups were compared using  
834 ANOVA by Tukey HSD test and Student's  $t$ -test. Different letters and asterisk above  
835 columns represent significant differences ( $P < 0.05$ ). Each mean  $\pm$  SE is from at least  
836 8 plants per group.

837

838 **FIGURE 6.** Effect of biostimulants on yield. **(A)** Mean  $\pm$  SE total fruit number per  
839 plant. **(B)** Correlation between mean  $\pm$  SE total fruit number and cumulative daily  
840 transpiration. Blue bars – untreated (with biostimulants) control plants; green bars –  
841 ICL-SW-treated plants; orange bars – ICL-NewFo1-treated plants. Solid bars – well-  
842 irrigated conditions; stippled bars – drought conditions. Groups were compared using  
843 ANOVA by Tukey HSD test and Student's  $t$ -test. Different letters and asterisk above  
844 columns represent significant differences ( $P < 0.05$ ). Each mean  $\pm$  SE is from at least  
845 8 plants per group.

846

847 **FIGURE 7.** Schematic model of plant responses to biostimulants (ICL-NewFo1 –  
848 orange line, ICL-SW – green line, untreated – blue line) under drought and recovery  
849 (modified from Moshelion et al., 2015). **(A)** Plant productivity vs. intensity and  
850 duration of stress. Under conditions characterized by an ample water supply, ICL-  
851 SW-treated plants have a higher transpiration level than ICL-NewFo1-treated and  
852 control plants, and thus higher levels of productivity (e.g., photosynthesis) (Phase I).  
853 As mild water stress develops (Phase II), ICL-SW-treated and control plants reduce  
854 transpiration steeply with decreasing water availability, limiting productivity. In  
855 contrast, ICL-NewFo1-treated plants show a relatively gradual decrease in  
856 transpiration and productivity as a trade-off to the decline in leaf water potential and  
857 relative water content. Nevertheless, after the initial drought (Phase II), their  
858 productivity may still be higher than that of ICL-SW-treated and control plants which  
859 have already reached minimal productivity. As drought stress becomes more severe  
860 (Phase III), the transpiration values and productivity of ICL-NewFo1-treated plants  
861 continue to decline to their minimum. **(B)** Evaluation of recovery from drought is an  
862 important step in assessing drought resilience. It reveals the plant's resistance to  
863 desiccation and ability to recover its pre-stress productivity, reflecting the extent of  
864 the damage caused by severe drought, such as cavitation or leaf/root loss. Both the  
865 ICL-SW-treated and control plants recover slowly compared to the ICL-NewFo1-  
866 treated plants. ICL-NewFo1 contributes to drought resistance by inducing more  
867 gradual water loss and resilience, thus contributing less to plant productivity and more  
868 to plant survivability. However, ICL-SW induces relatively faster water loss, and only

869 increases productivity under optimal conditions while having no effect on the  
870 survivability of the plants under drought.  
871  
872



Figure 1

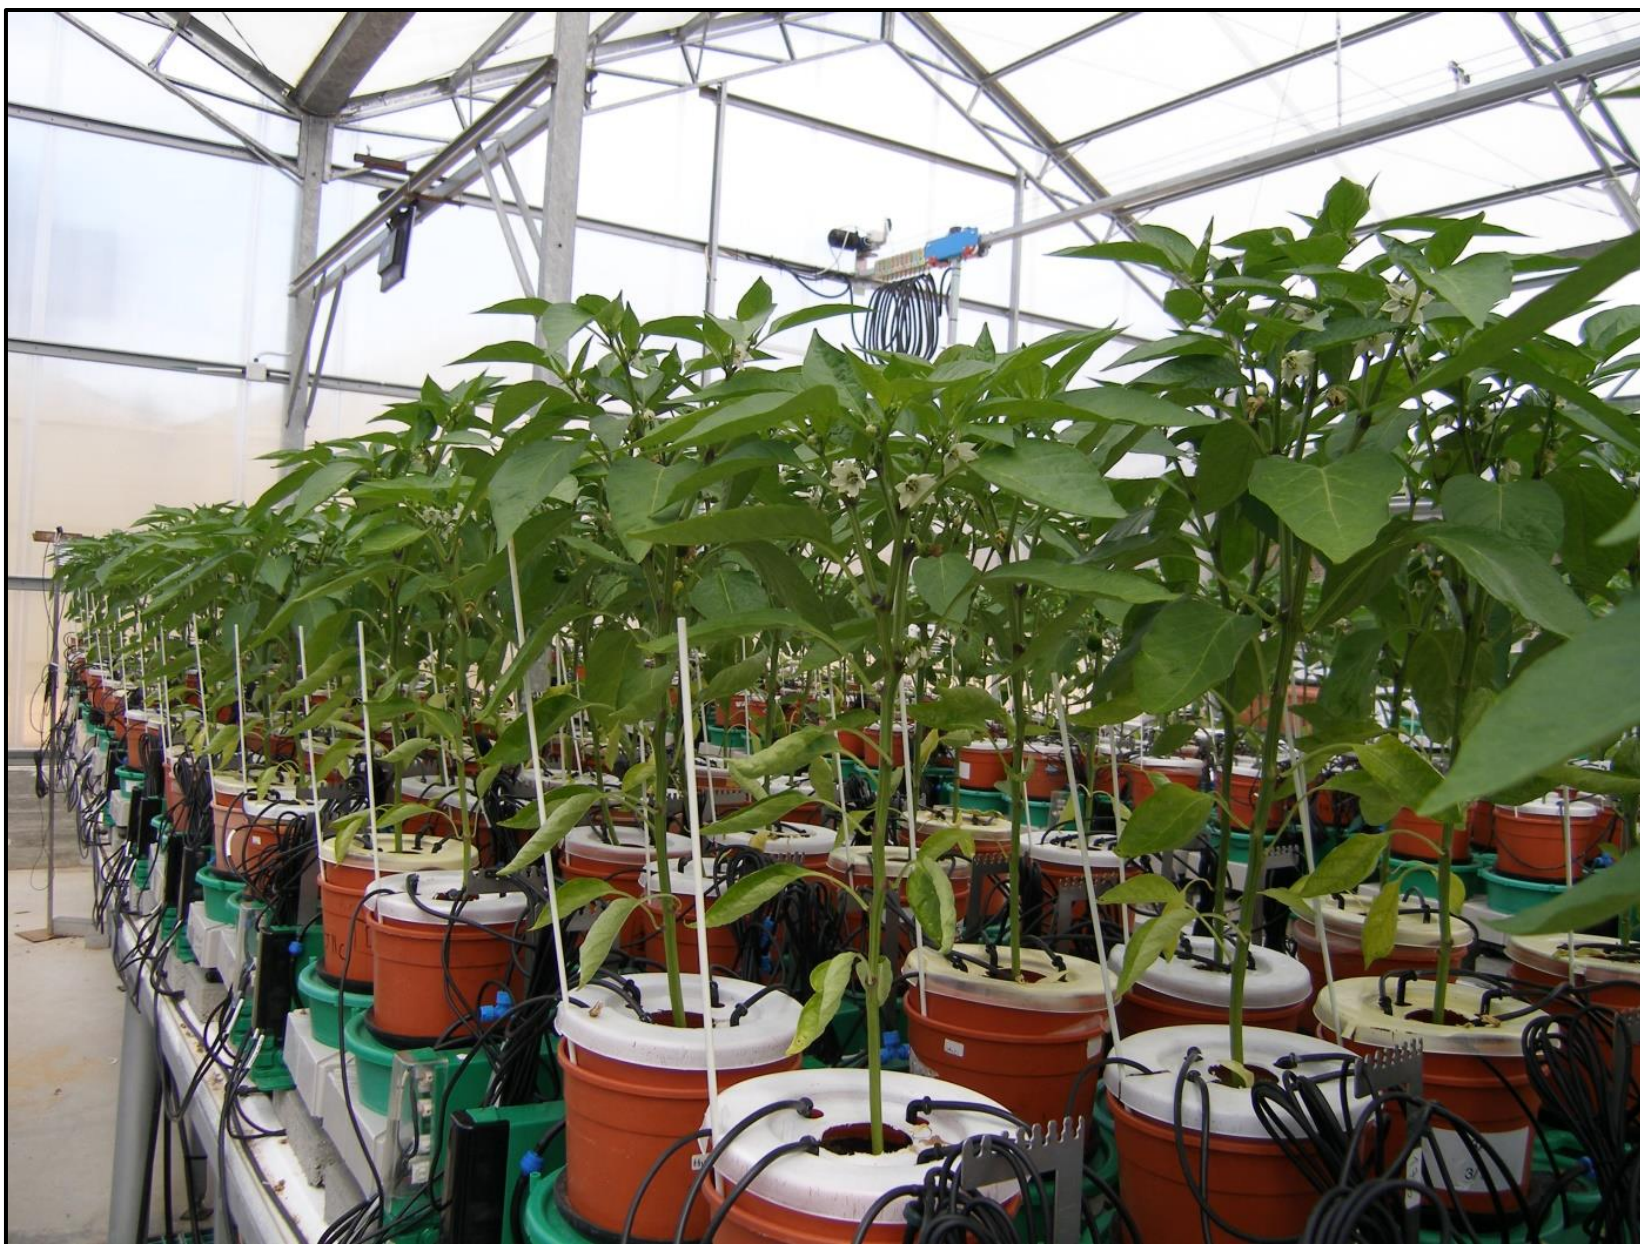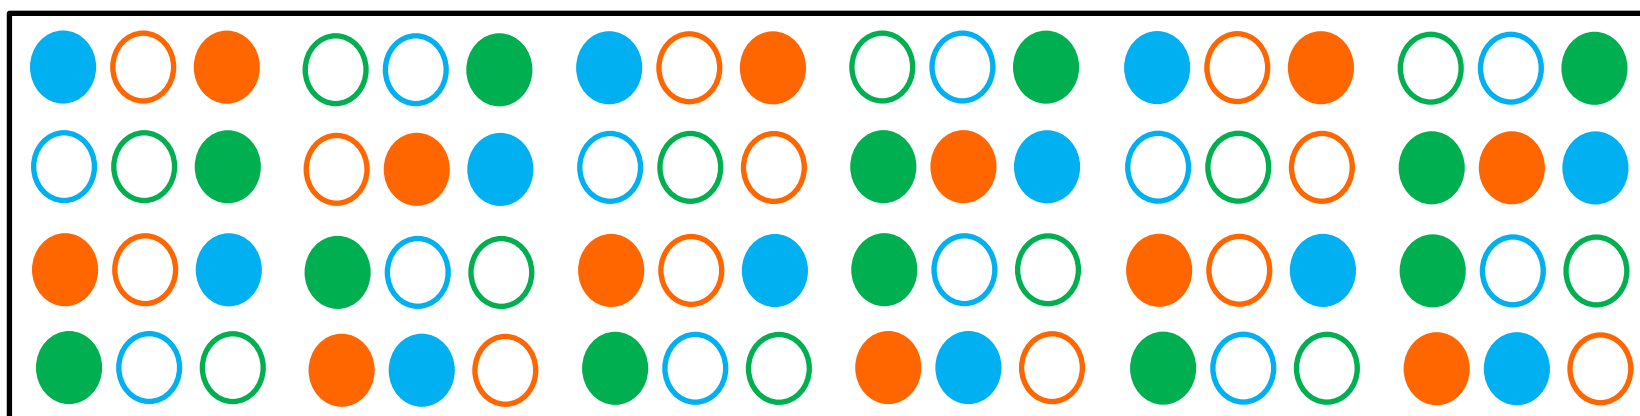

Randomized arrangement of plants



Figure 2

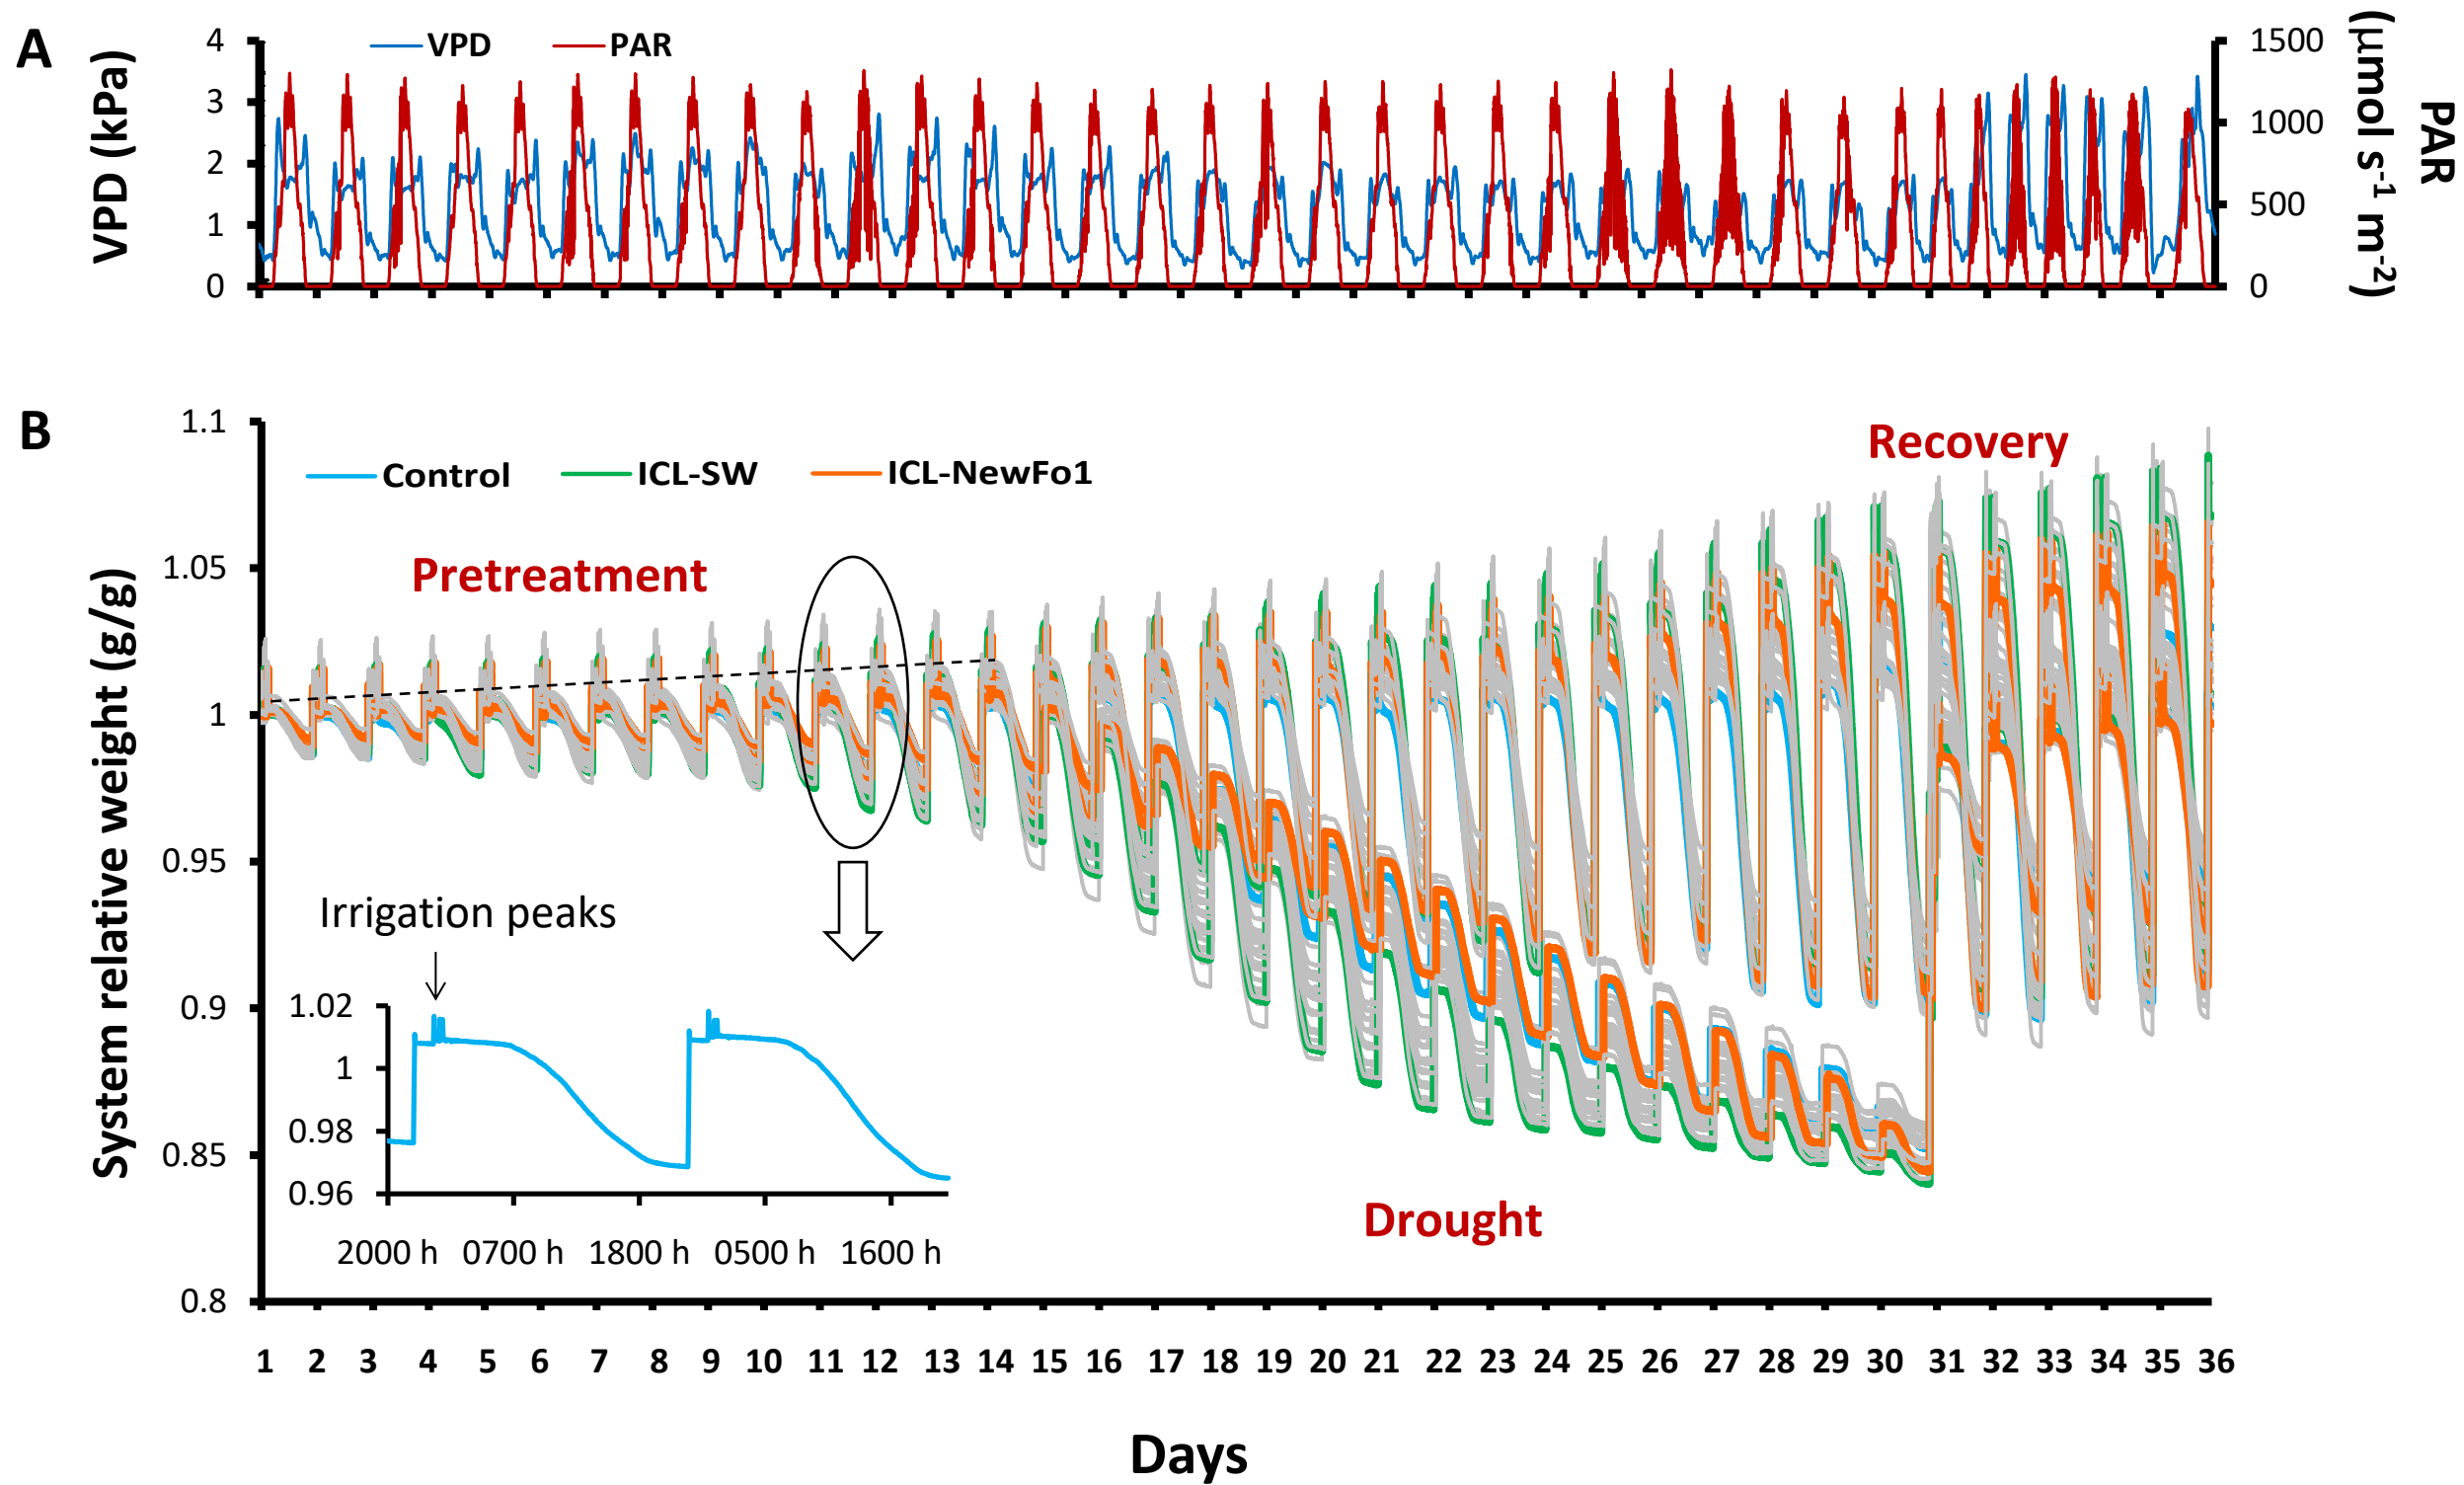

**Figure 3**

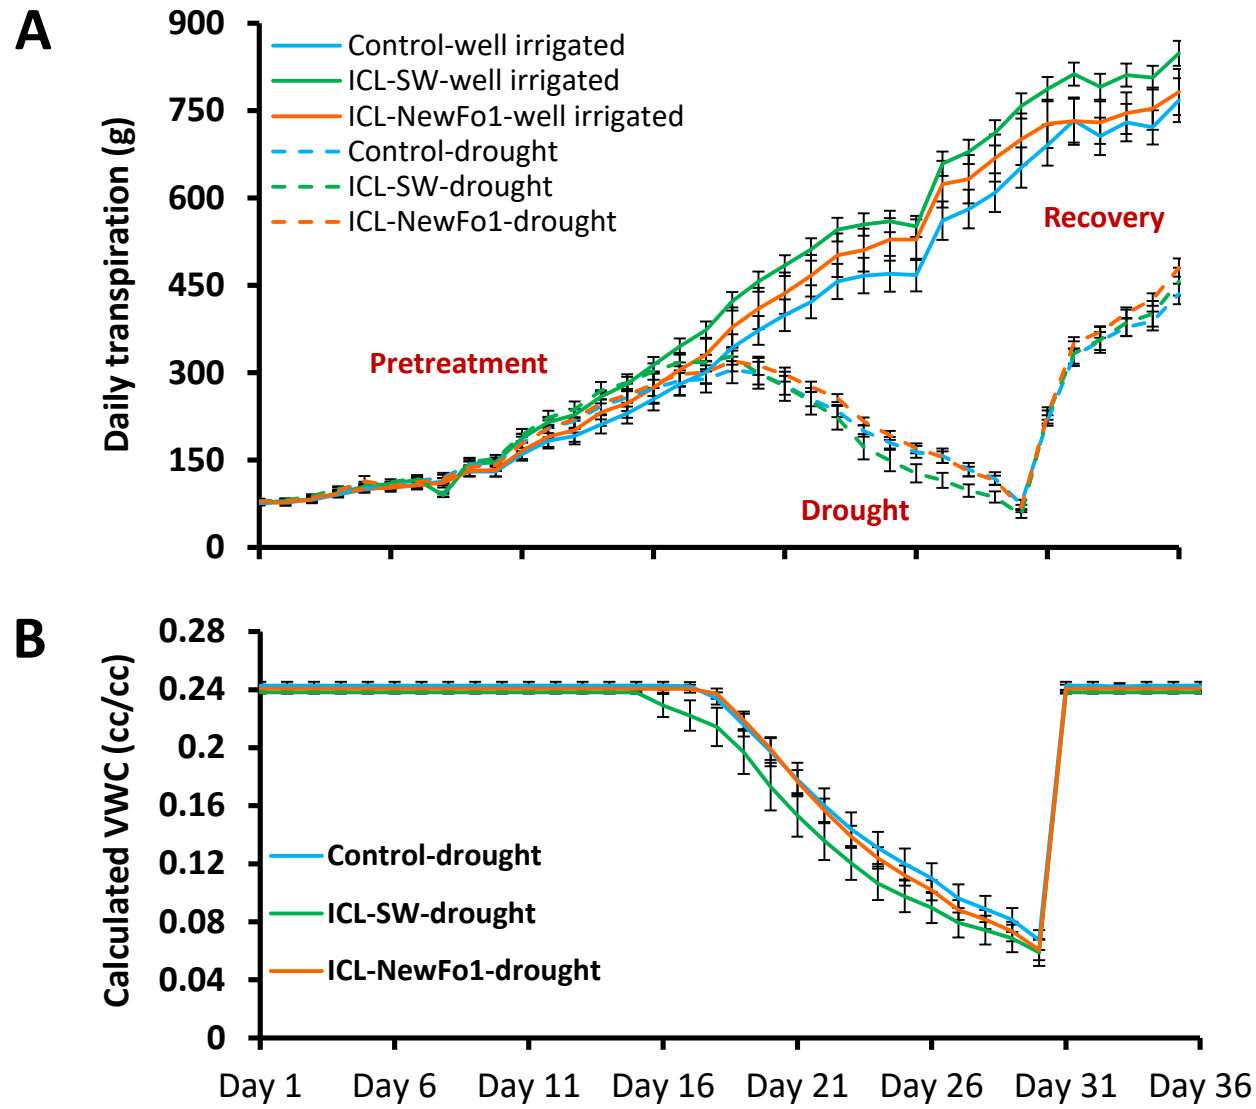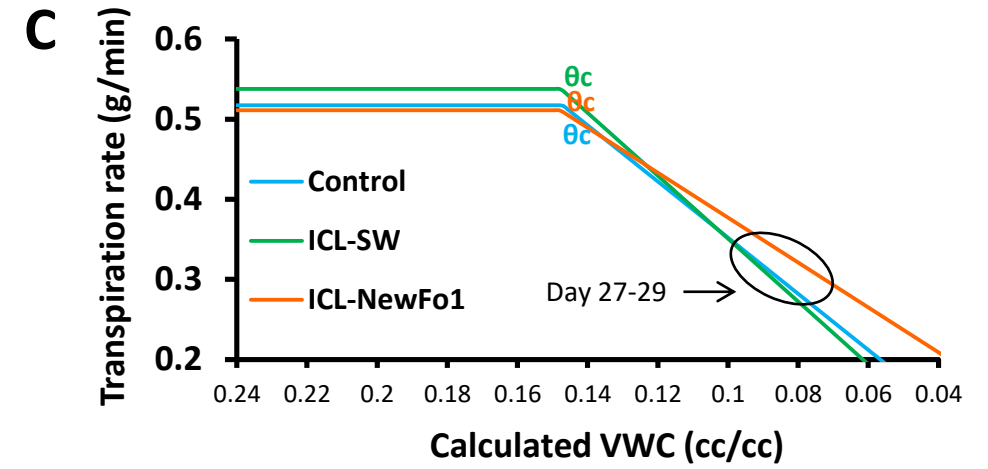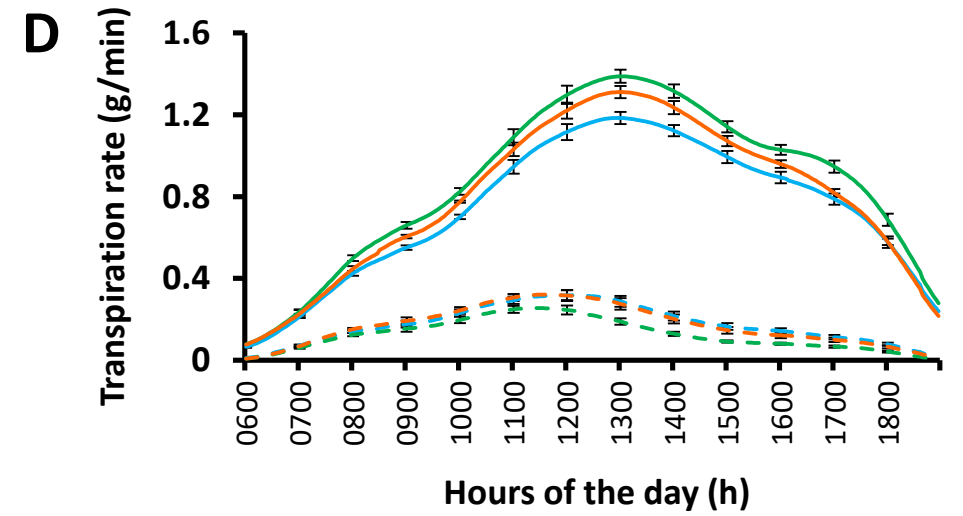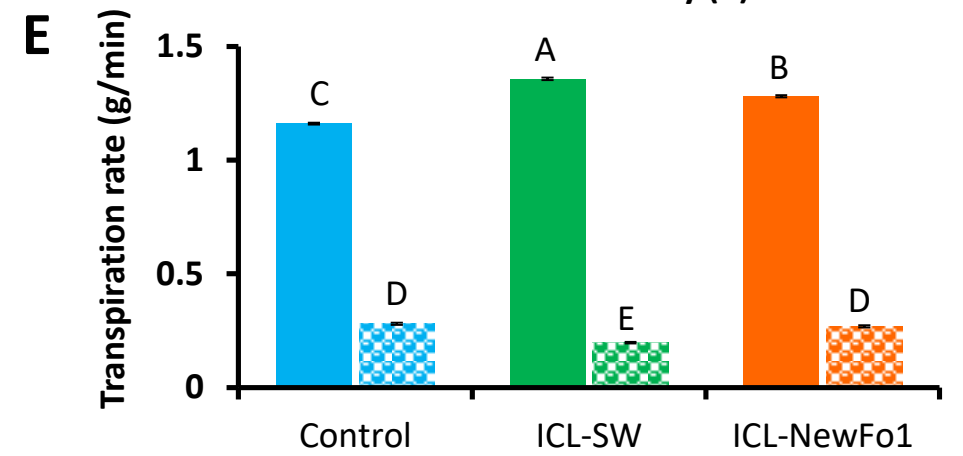

**Figure 4**

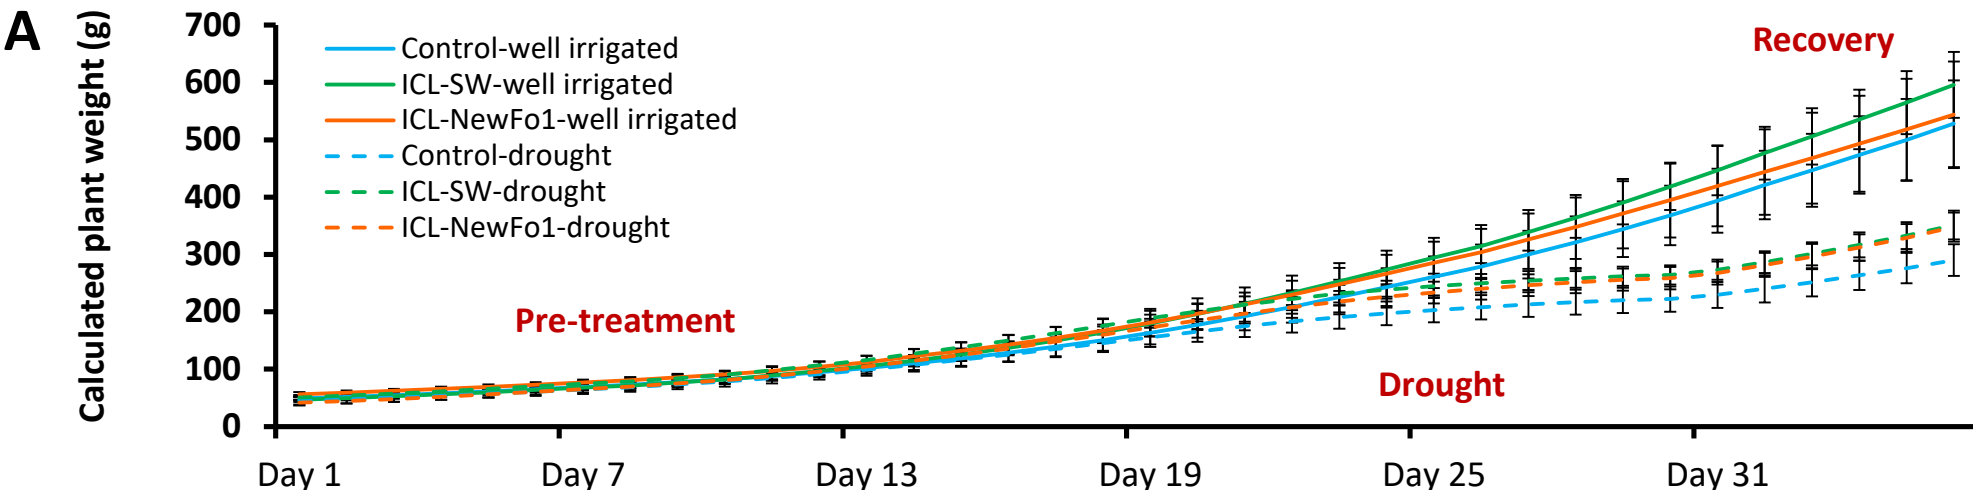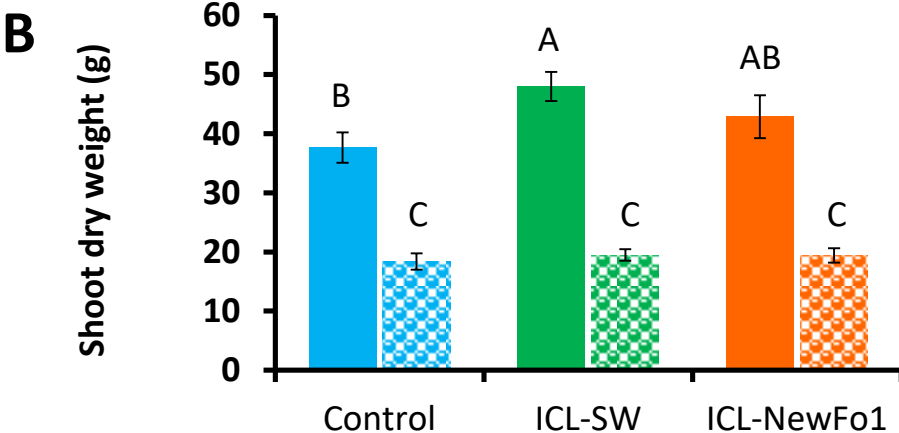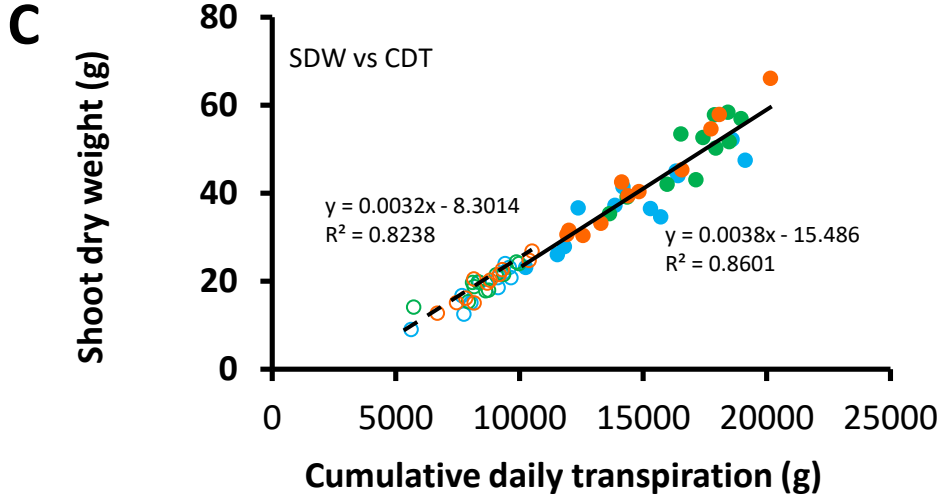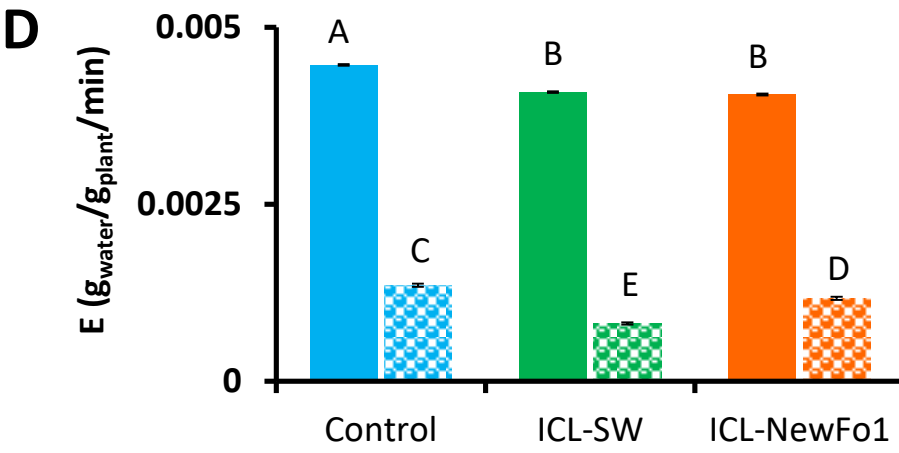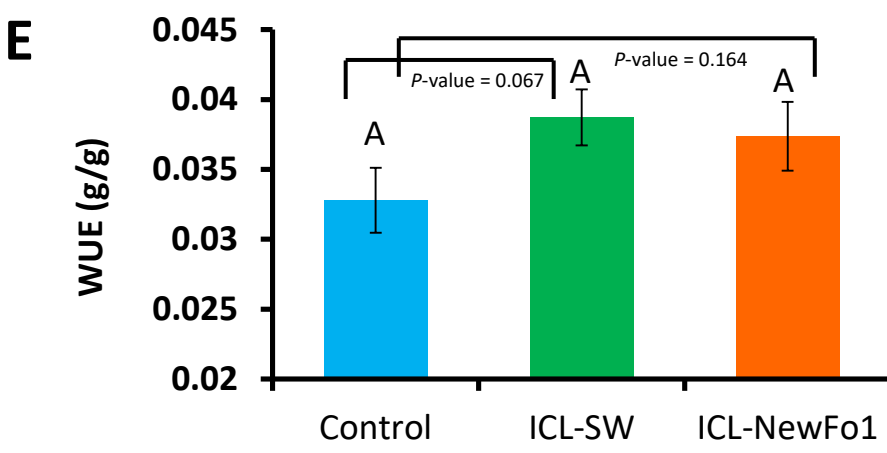

**Figure 5**

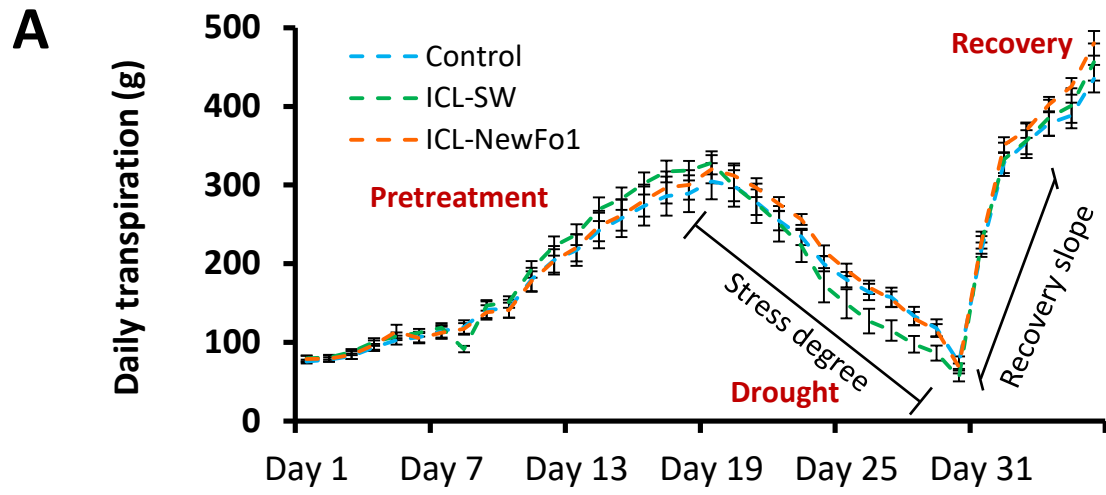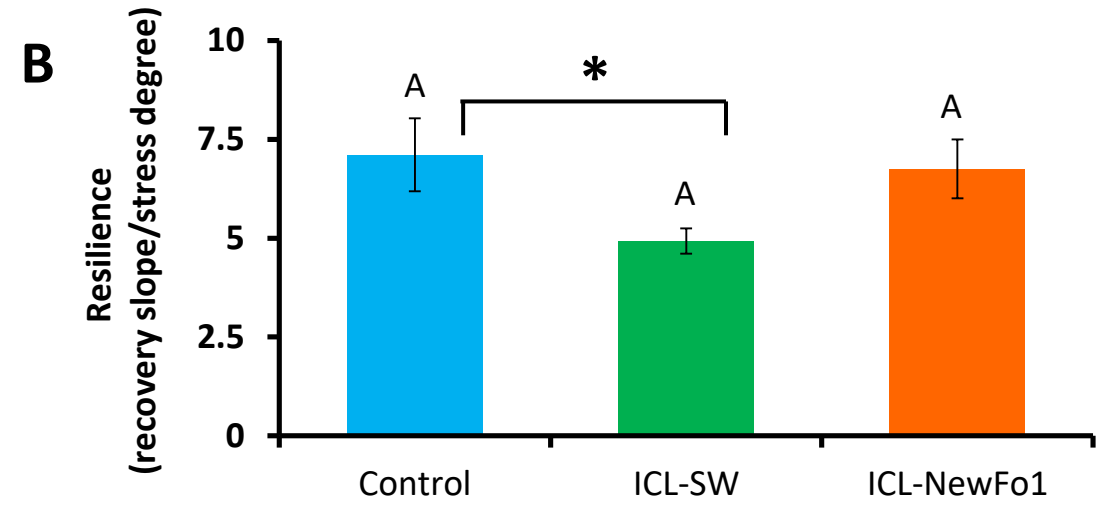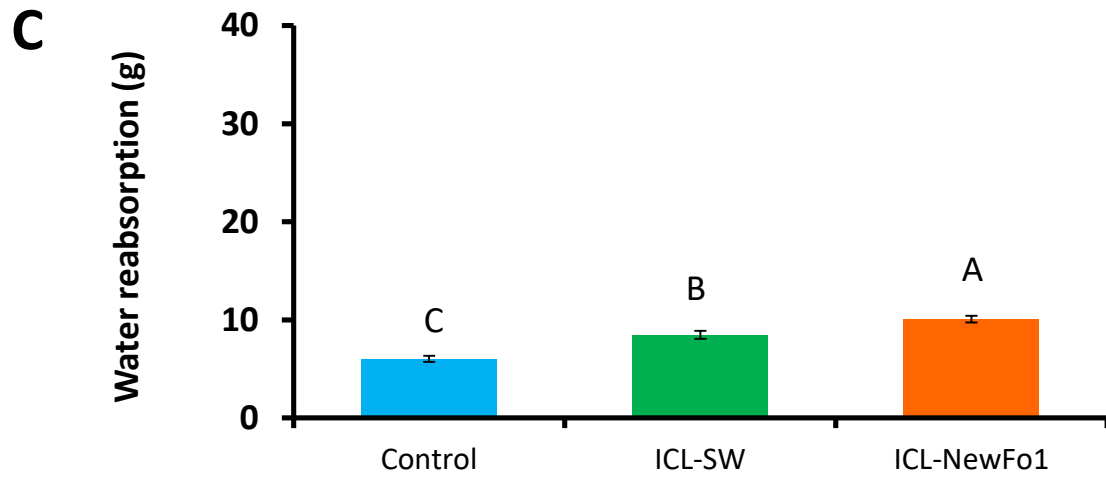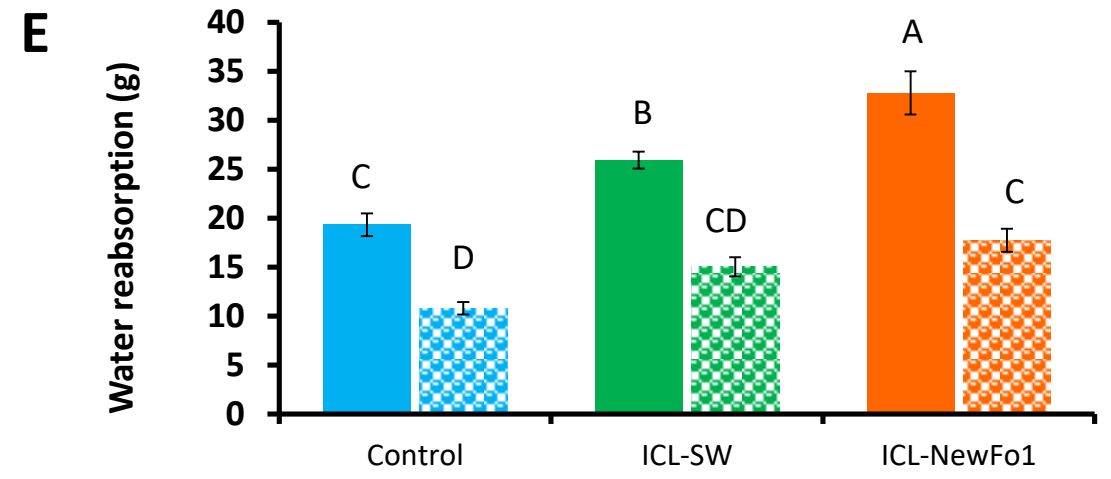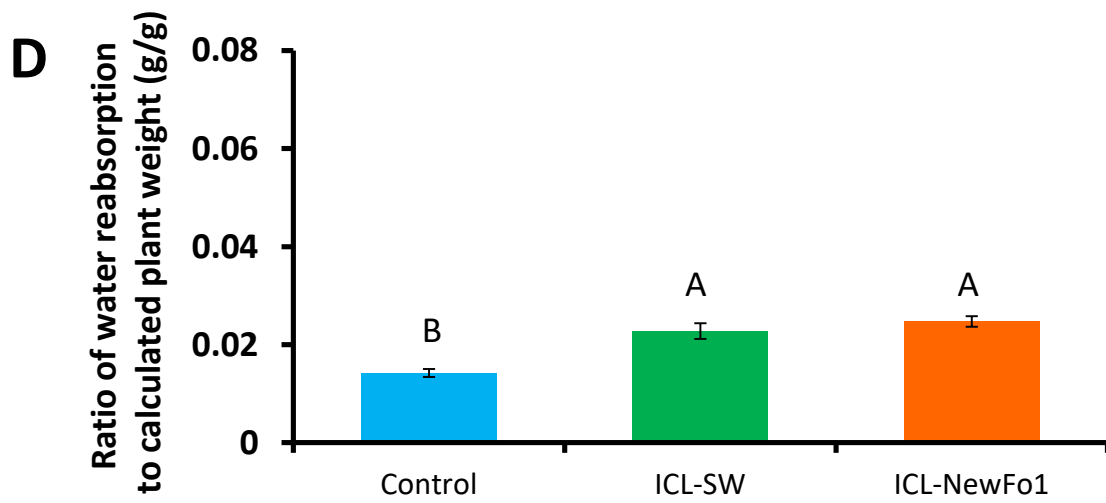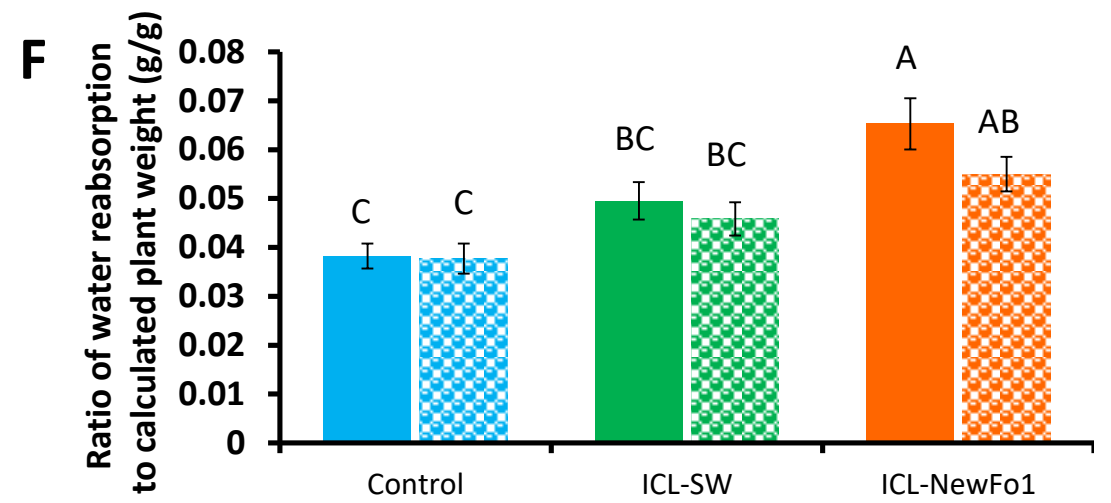

**Pretreatment**

**Recovery**

Figure 6

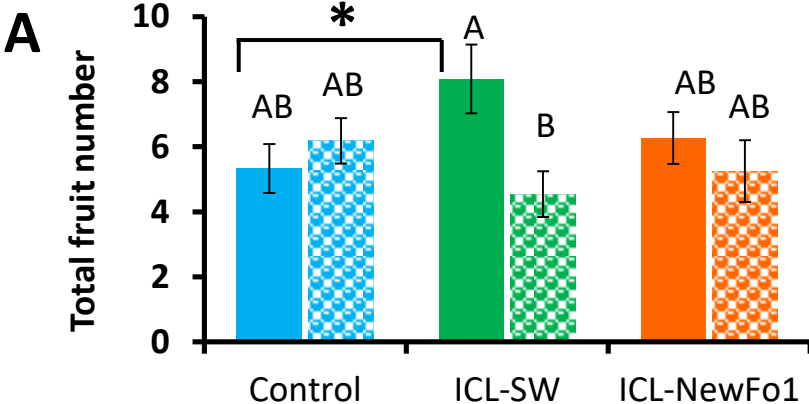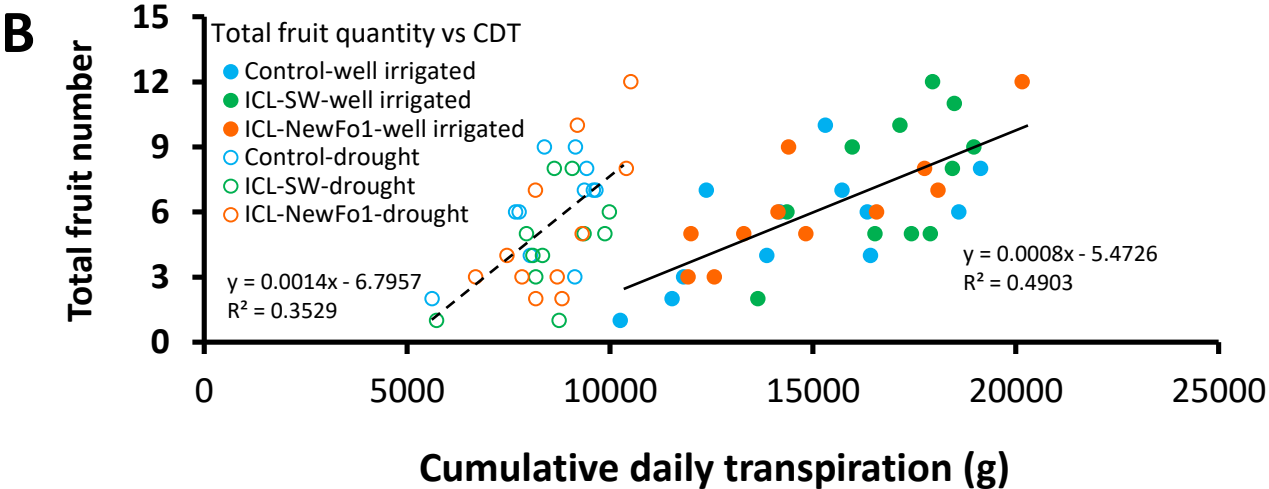

Figure 7

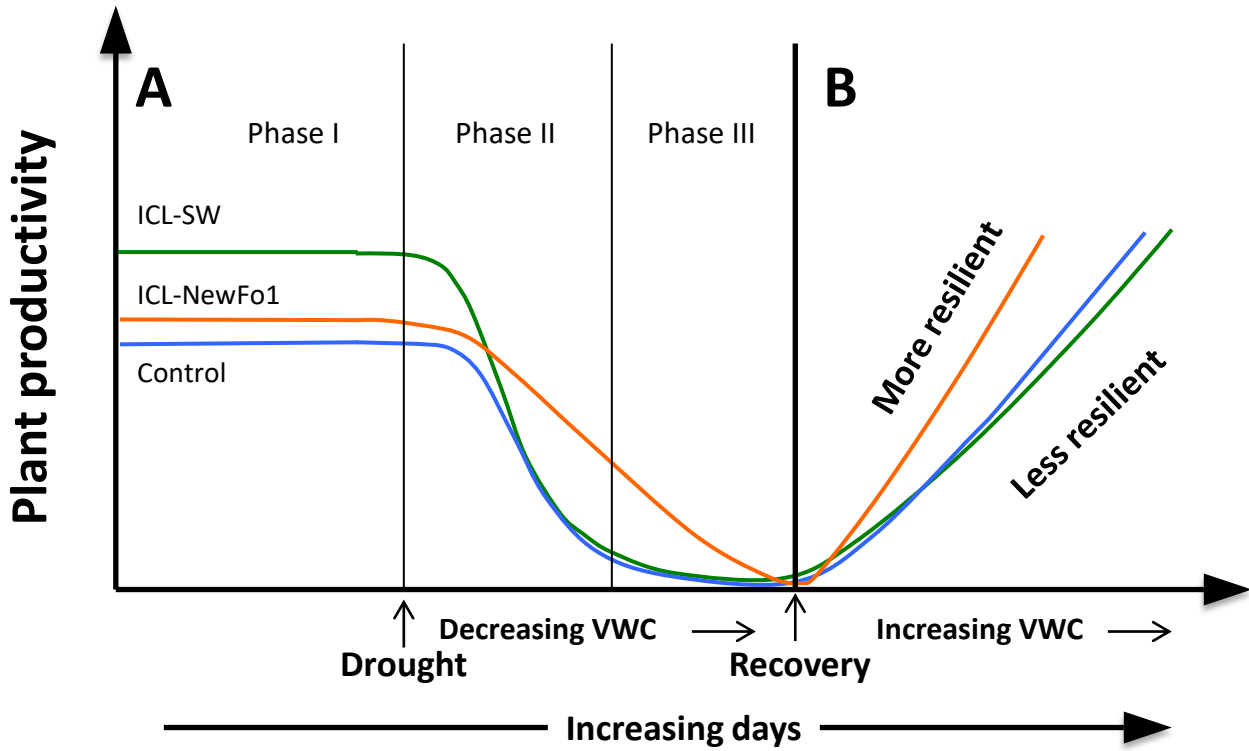

Source: http://biorxiv.org/content/10.1101/525592v1.full.pdf
